# Supplementary material for: Pseudo-chromosome length genome assembly of a double haploid ‘Bartlett’ pear (Pyrus communis L.)
Source: bioRxiv or medRxiv preprint supplement (doi:10.1101/651778), 2019-07-05
Supplement: Supplementary file [file media-1.pdf]

## Supplementary Figures

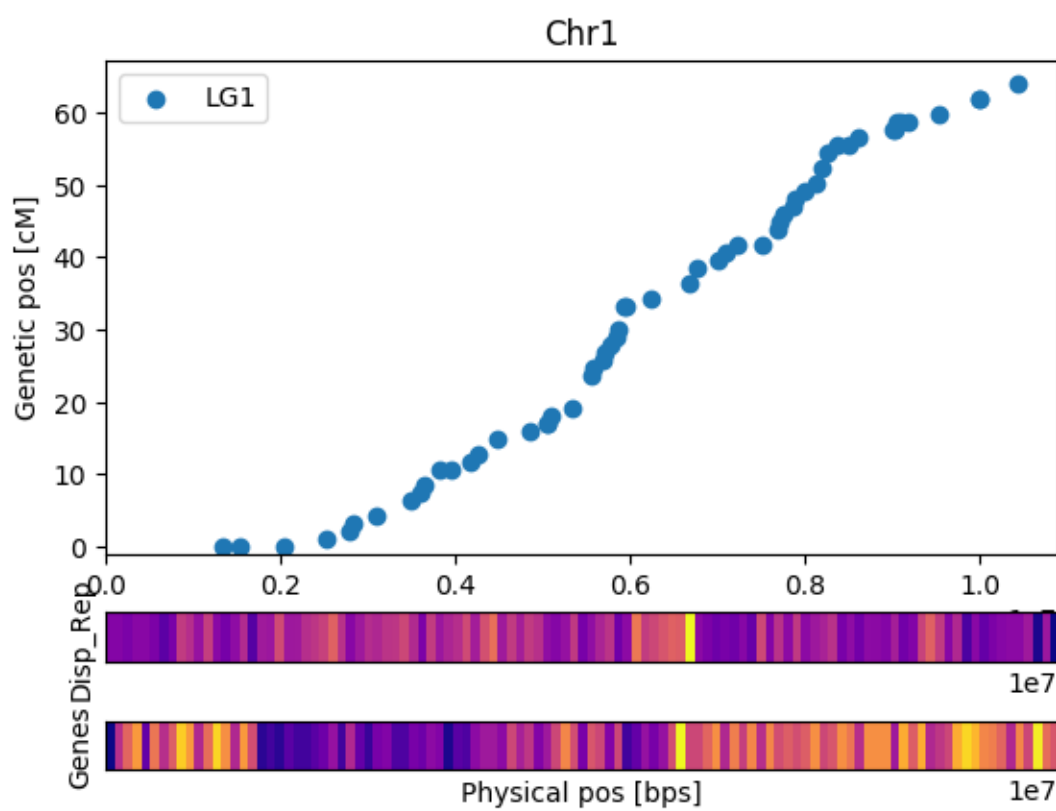

**Figure S1: Marey plot of Chr1 with heatmap of Dispersed Repeats and Genes in bins of 200kb. The lighter the color the more elements are present.**

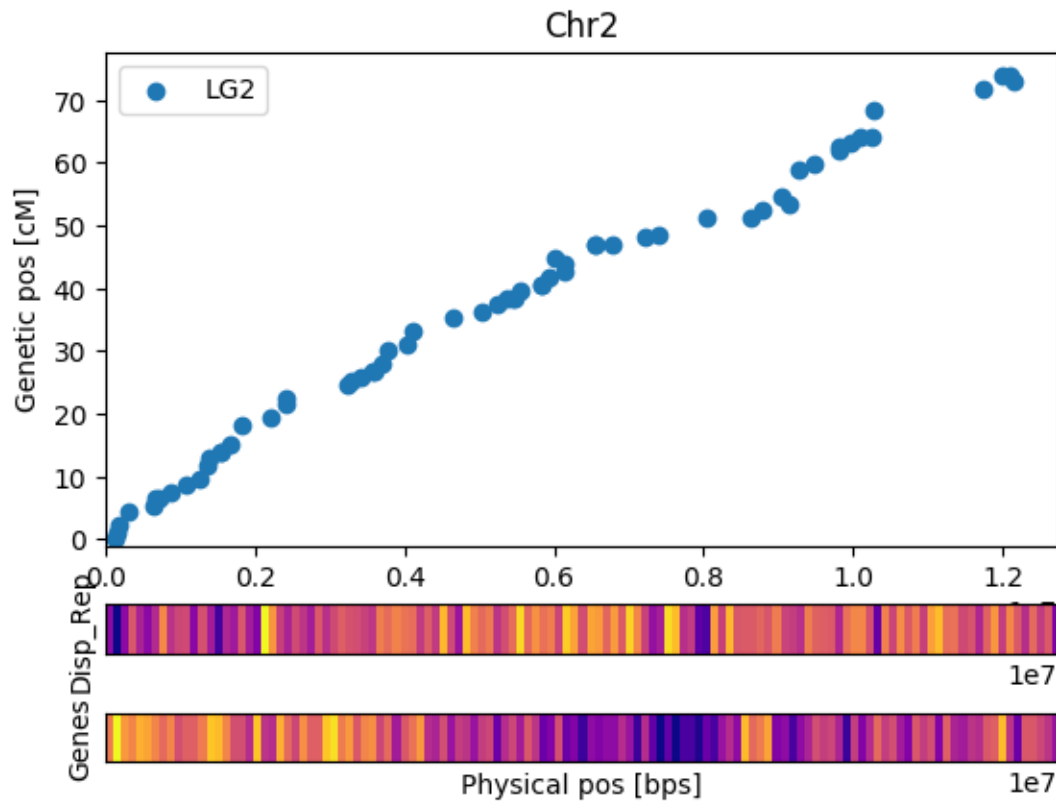

**Figure S2: Marey plot of Chr2 with heatmap of Dispersed Repeats and Genes in bins of 200kb. The lighter the color the more elements are present.**

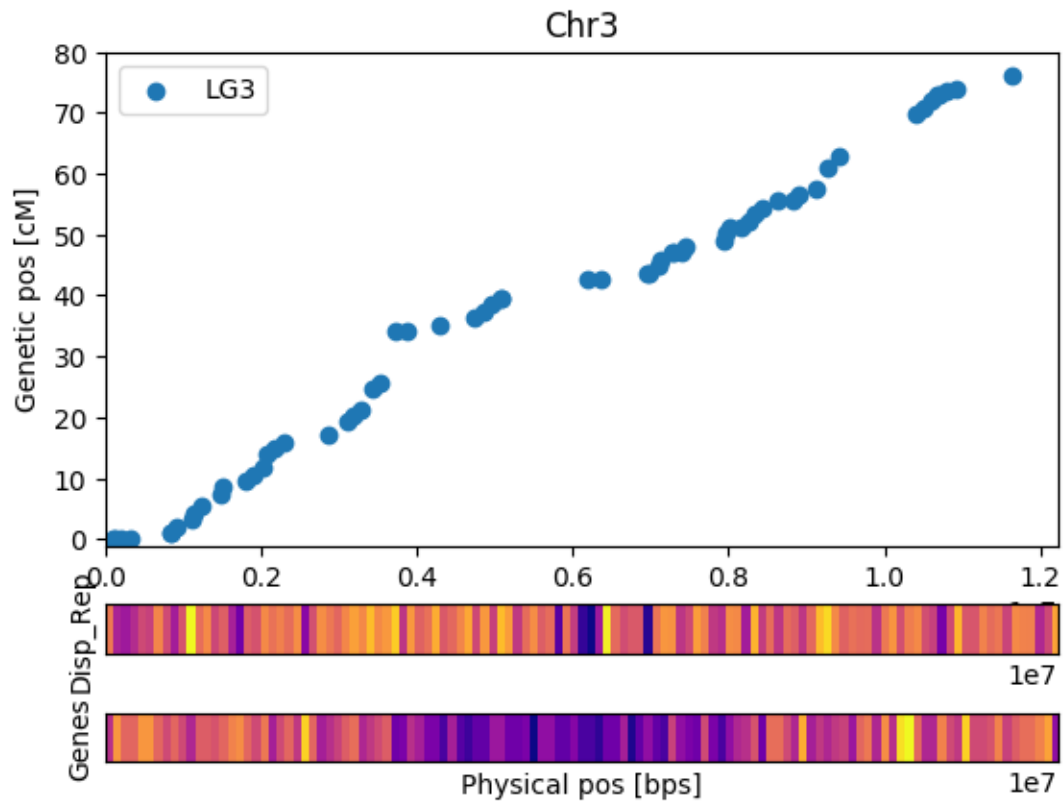

**Figure S3: Marey plot of Chr3 with heatmap of Dispersed Repeats and Genes in bins of 200kb. The lighter the color the more elements are present.**

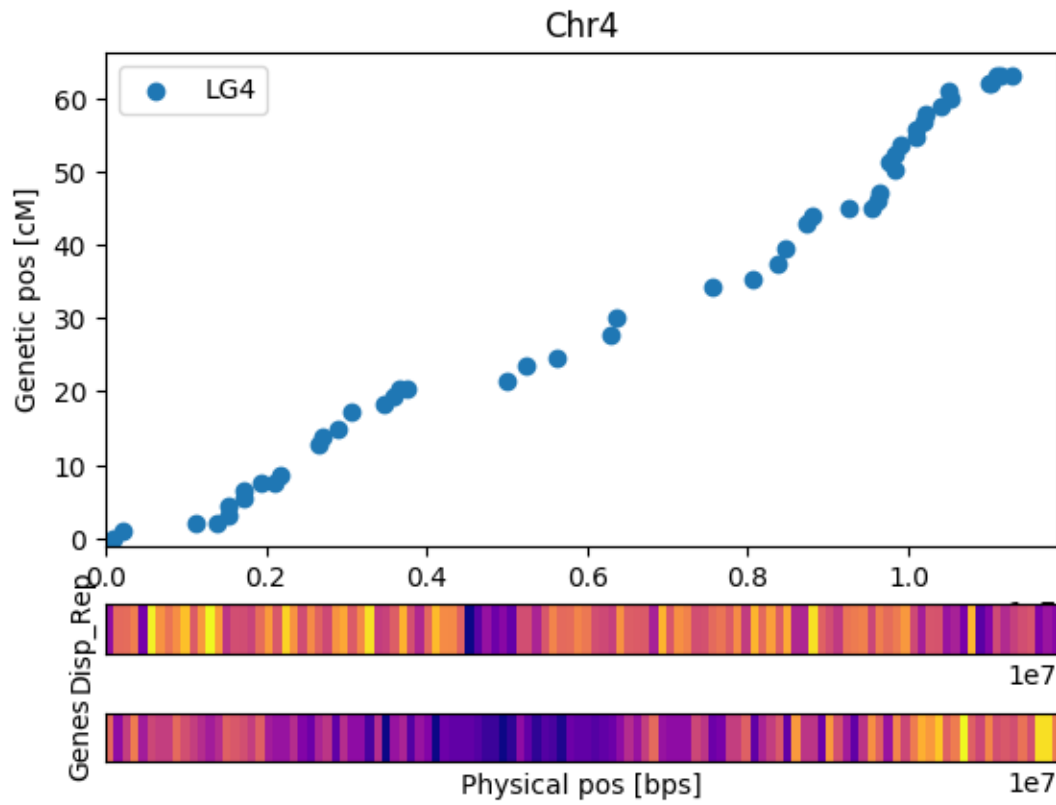

**Figure S4: Marey plot of Chr4 with heatmap of Dispersed Repeats and Genes in bins of 200kb. The lighter the color the more elements are present.**



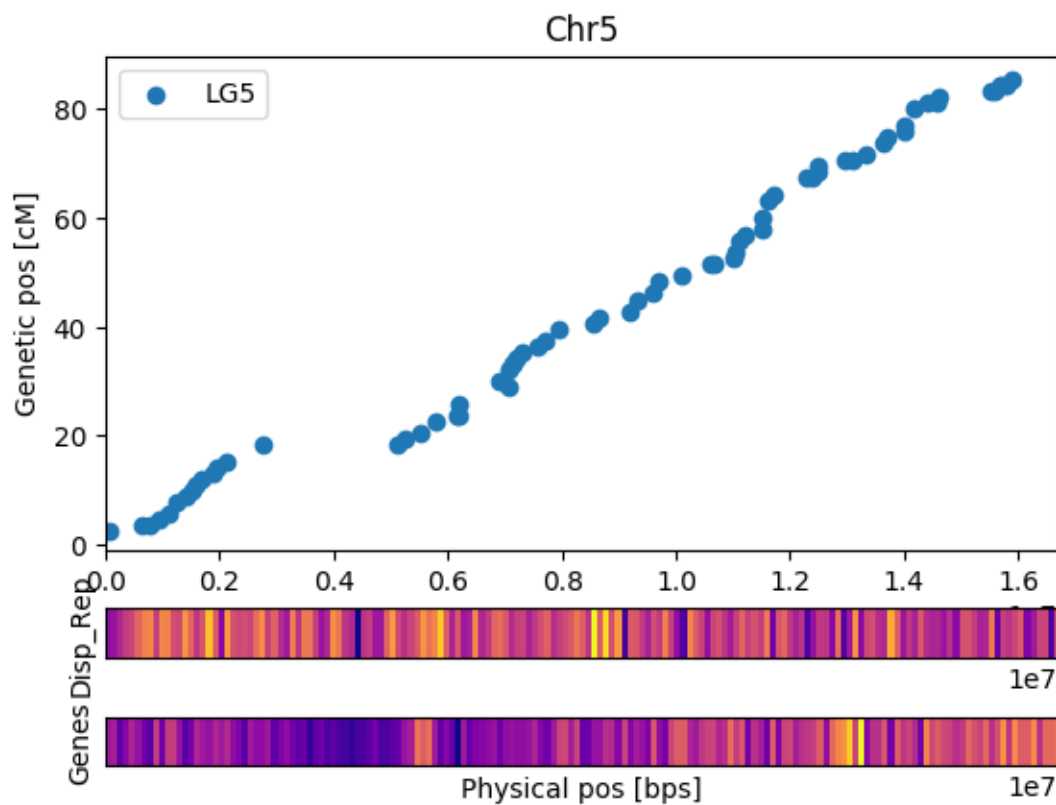

**Figure S5: Marey plot of Chr5 with heatmap of Dispersed Repeats and Genes in bins of 200kb. The lighter the color the more elements are present.**

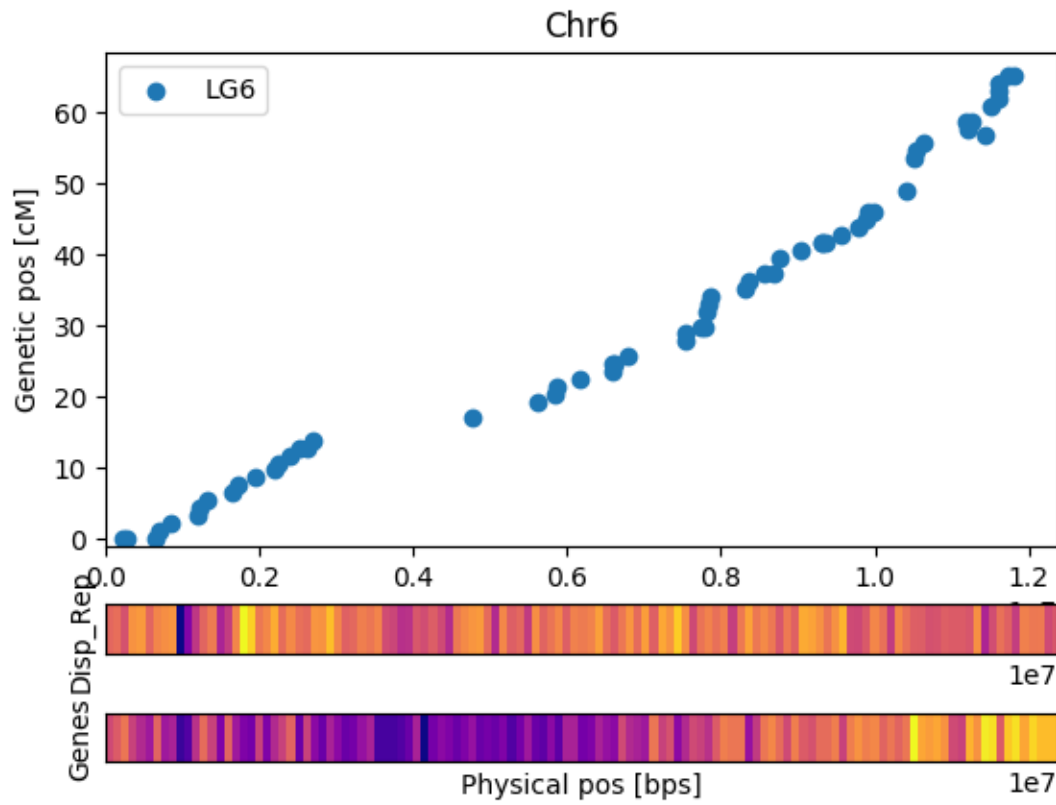

**Figure S6: Marey plot of Chr6 with heatmap of Dispersed Repeats and Genes in bins of 200kb. The lighter the color the more elements are present.**

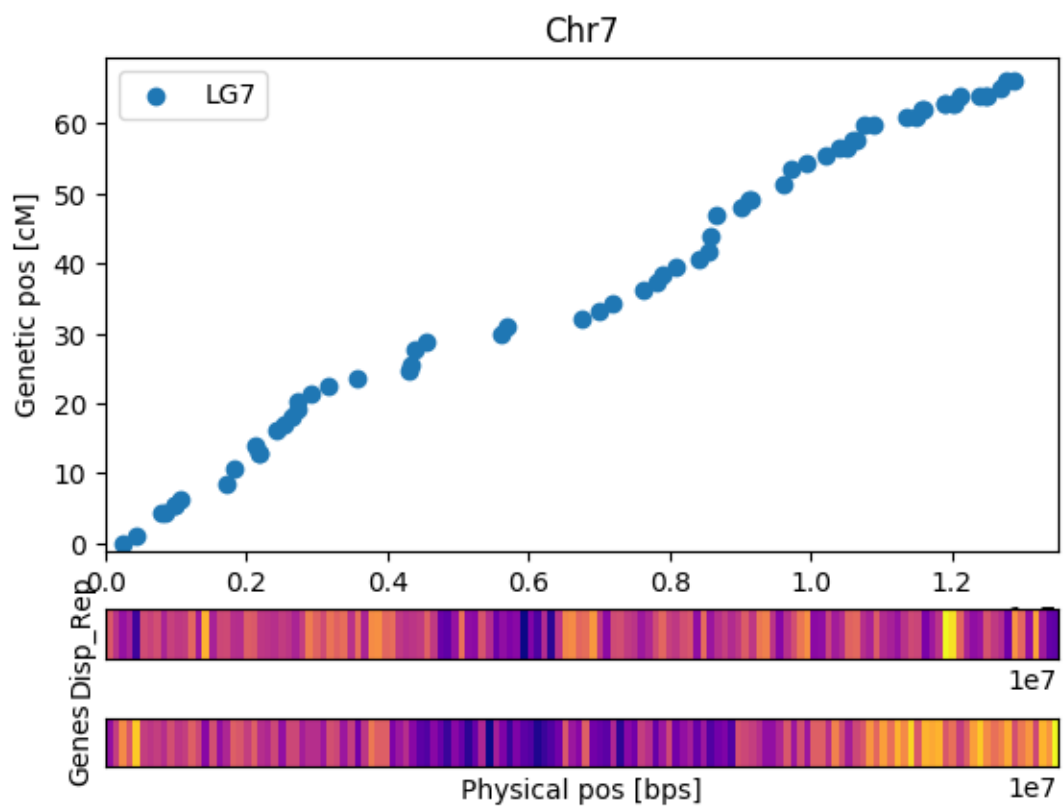

**Figure S7: Marey plot of Chr7 with heatmap of Dispersed Repeats and Genes in bins of 200kb. The lighter the color the more elements are present.**

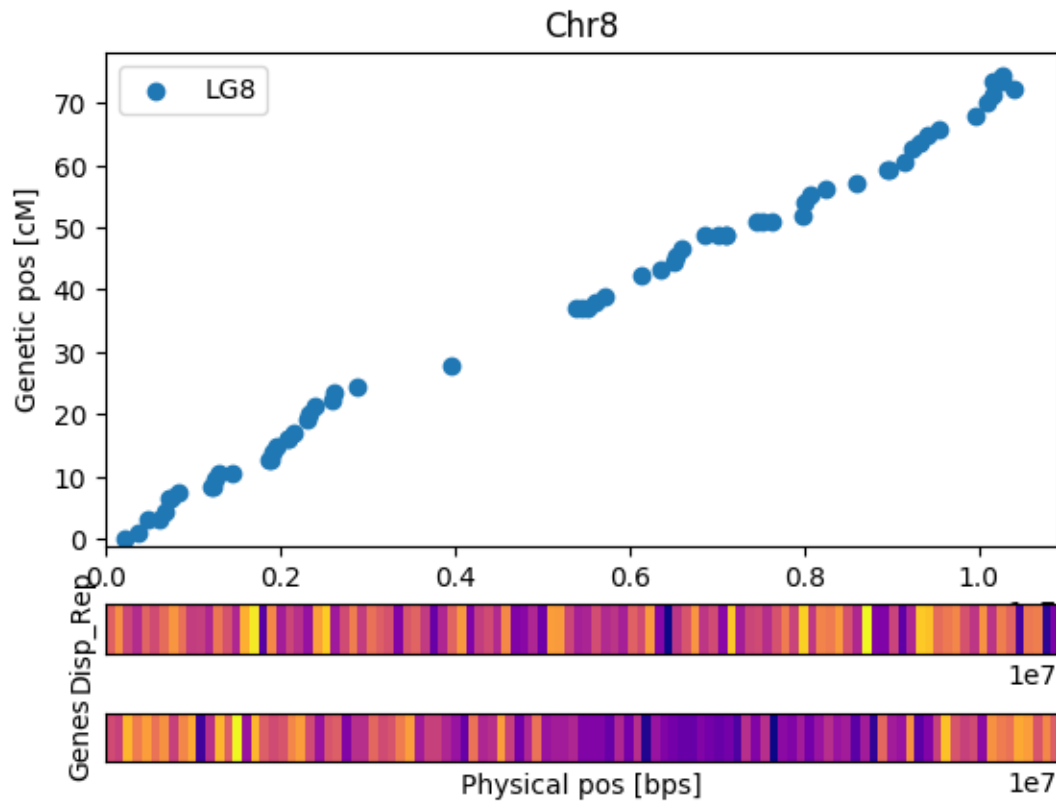

**Figure S8: Marey plot of Chr8 with heatmap of Dispersed Repeats and Genes in bins of 200kb. The lighter the color the more elements are present.**

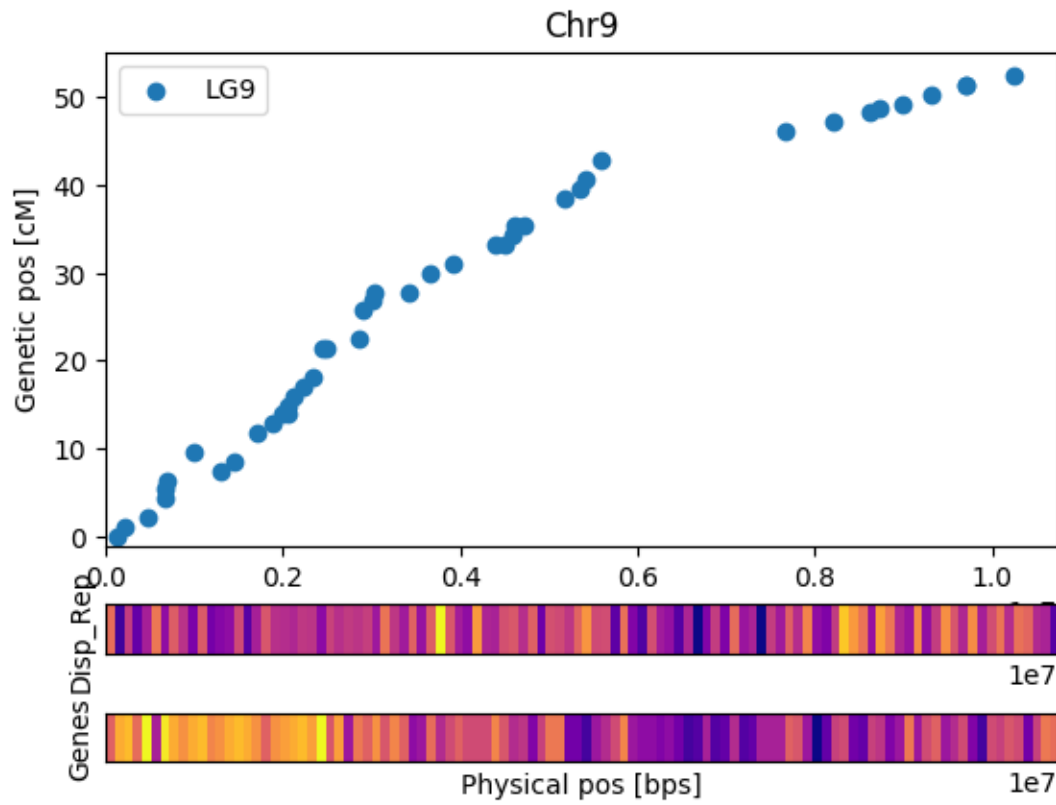

**Figure S9: Marey plot of Chr9 with heatmap of Dispersed Repeats and Genes in bins of 200kb. The lighter the color the more elements are present.**

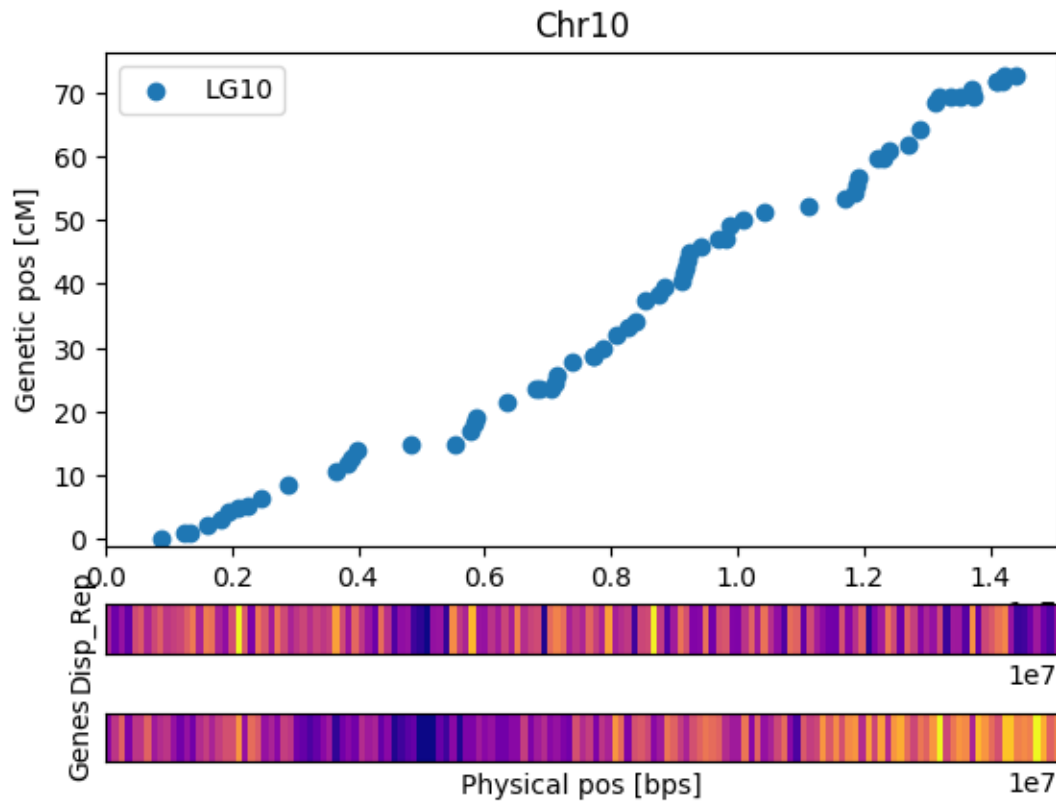

**Figure S10: Marey plot of Chr10 with heatmap of Dispersed Repeats and Genes in bins of 200kb. The lighter the color the more elements are present.**

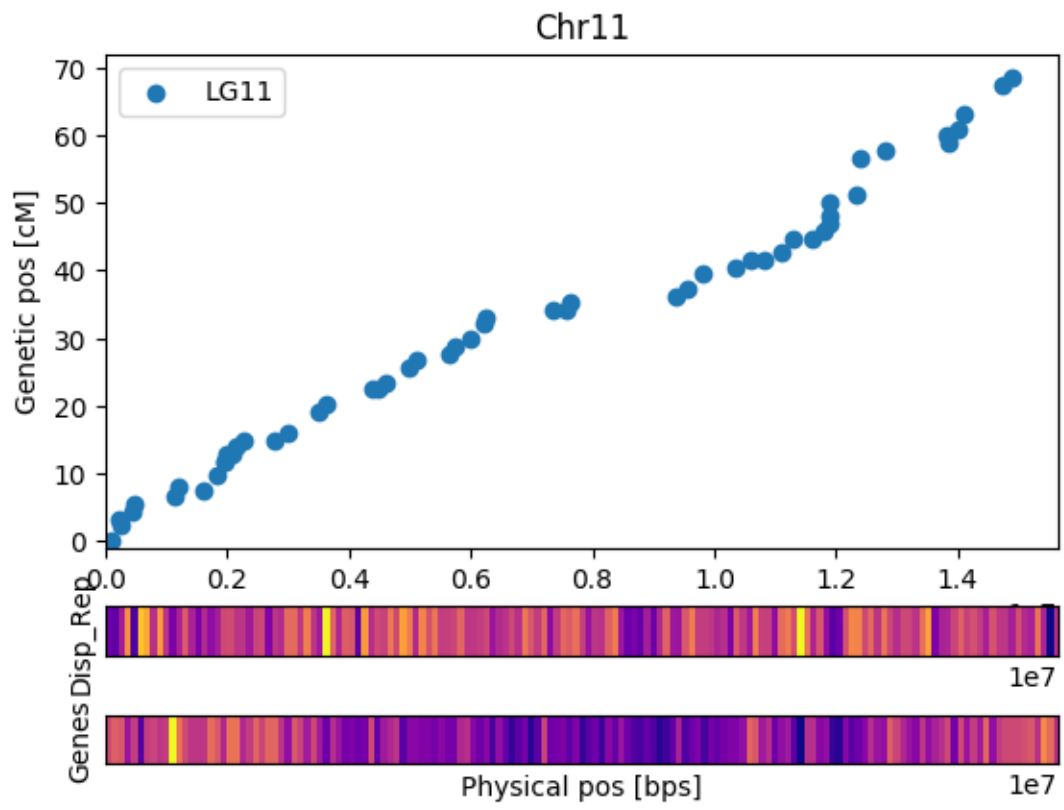

**Figure S11: Marey plot of Chr11 with heatmap of Dispersed Repeats and Genes in bins of 200kb. The lighter the color the more elements are present.**

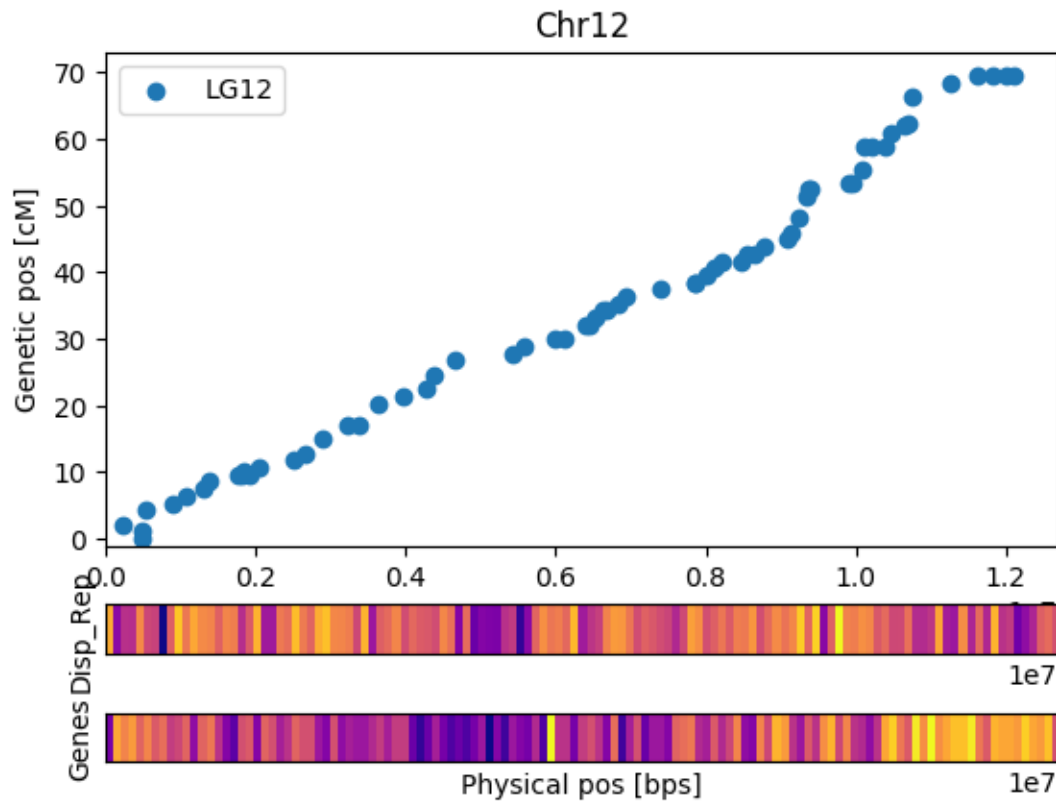

**Figure S12: Marey plot of Chr12 with heatmap of Dispersed Repeats and Genes in bins of 200kb. The lighter the color the more elements are present.**



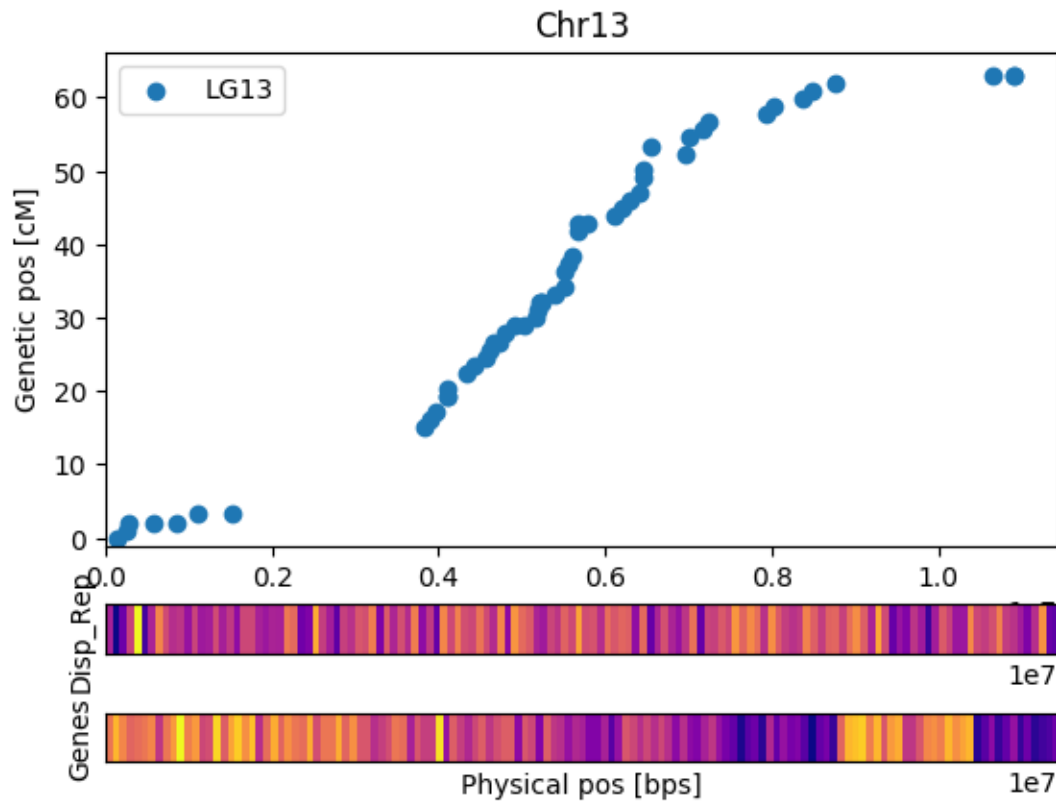

**Figure S13: Marey plot of Chr13 with heatmap of Dispersed Repeats and Genes in bins of 200kb. The lighter the color the more elements are present.**

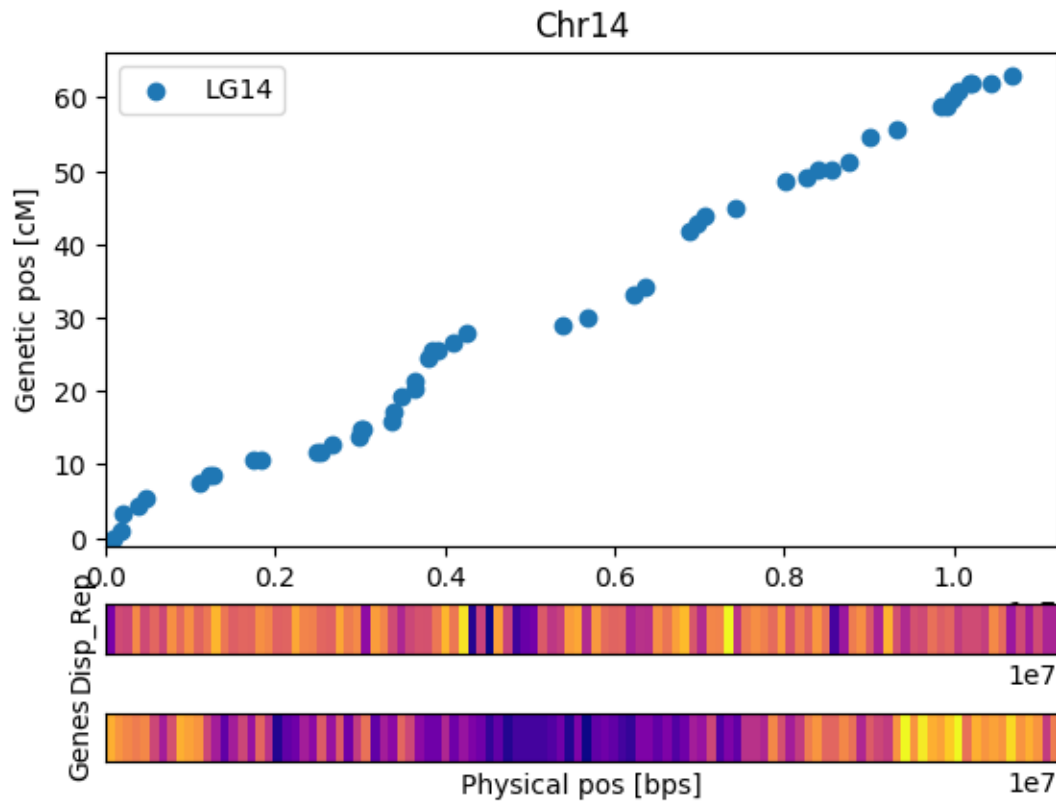

**Figure S14: Marey plot of Chr14 with heatmap of Dispersed Repeats and Genes in bins of 200kb. The lighter the color the more elements are present.**

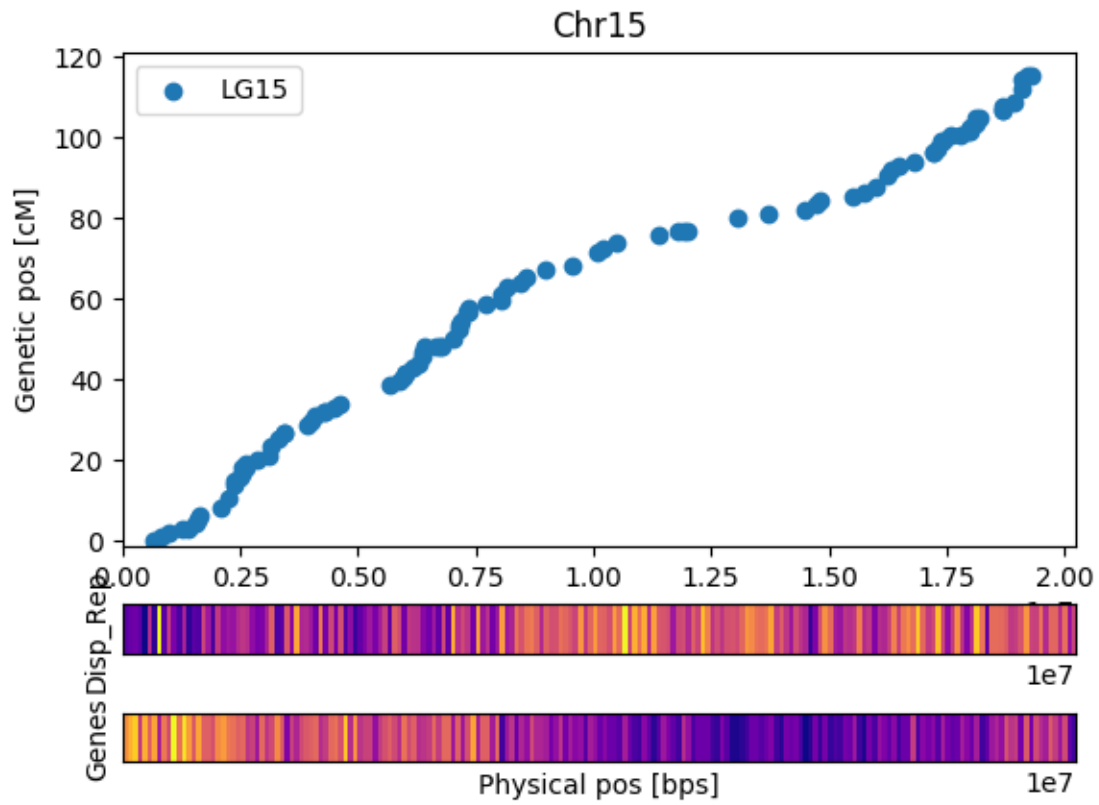

**Figure S15: Marey plot of Chr15 with heatmap of Dispersed Repeats and Genes in bins of 200kb. The lighter the color the more elements are present.**

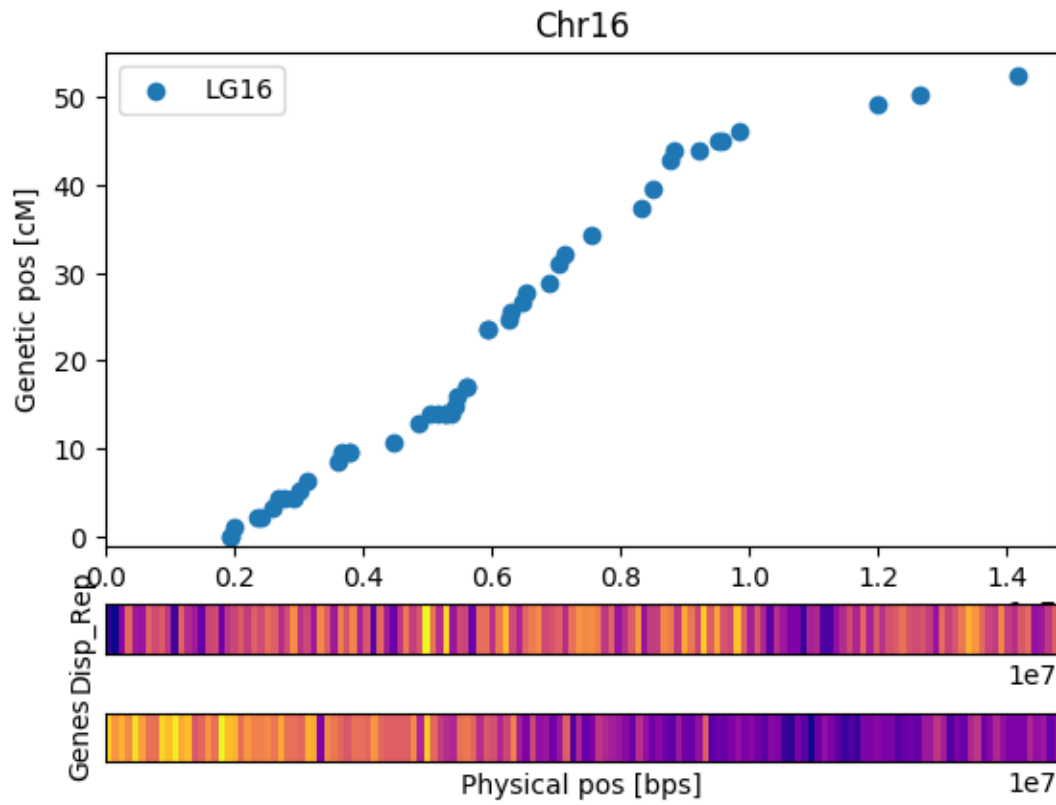

**Figure S16: Marey plot of Chr16 with heatmap of Dispersed Repeats and Genes in bins of 200kb. The lighter the color the more elements are present.**

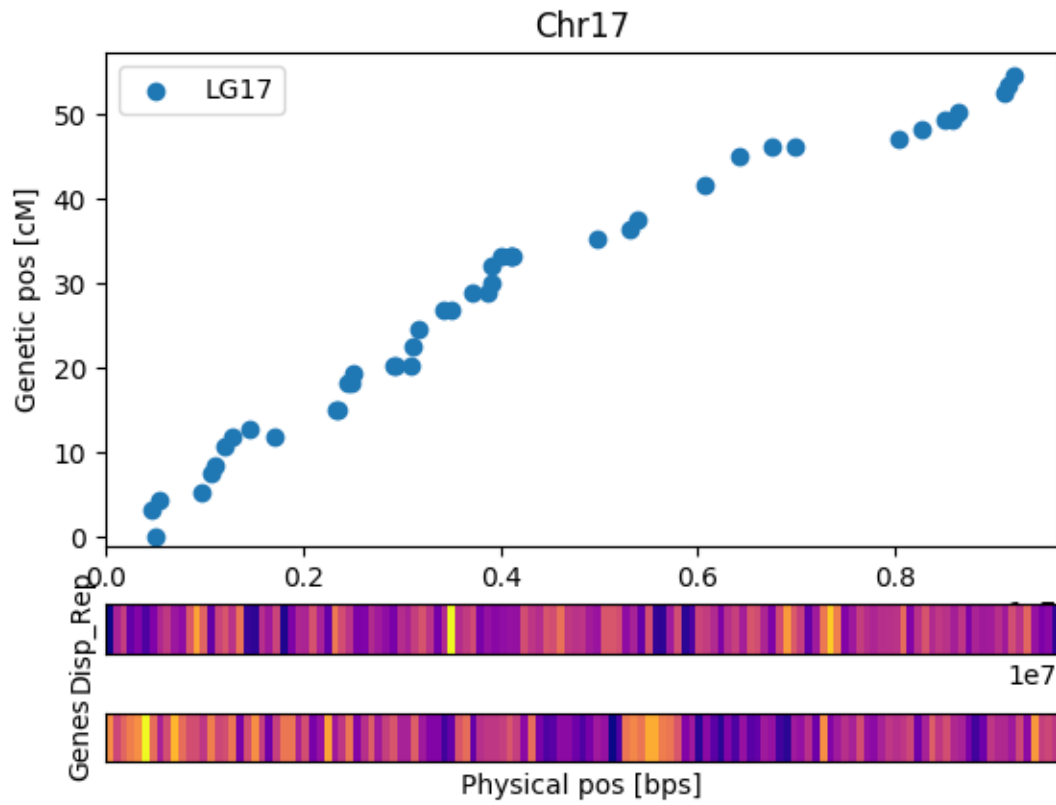

**Figure S17: Marey plot of Chr17 with heatmap of Dispersed Repeats and Genes in bins of 200kb. The lighter the color the more elements are present.**

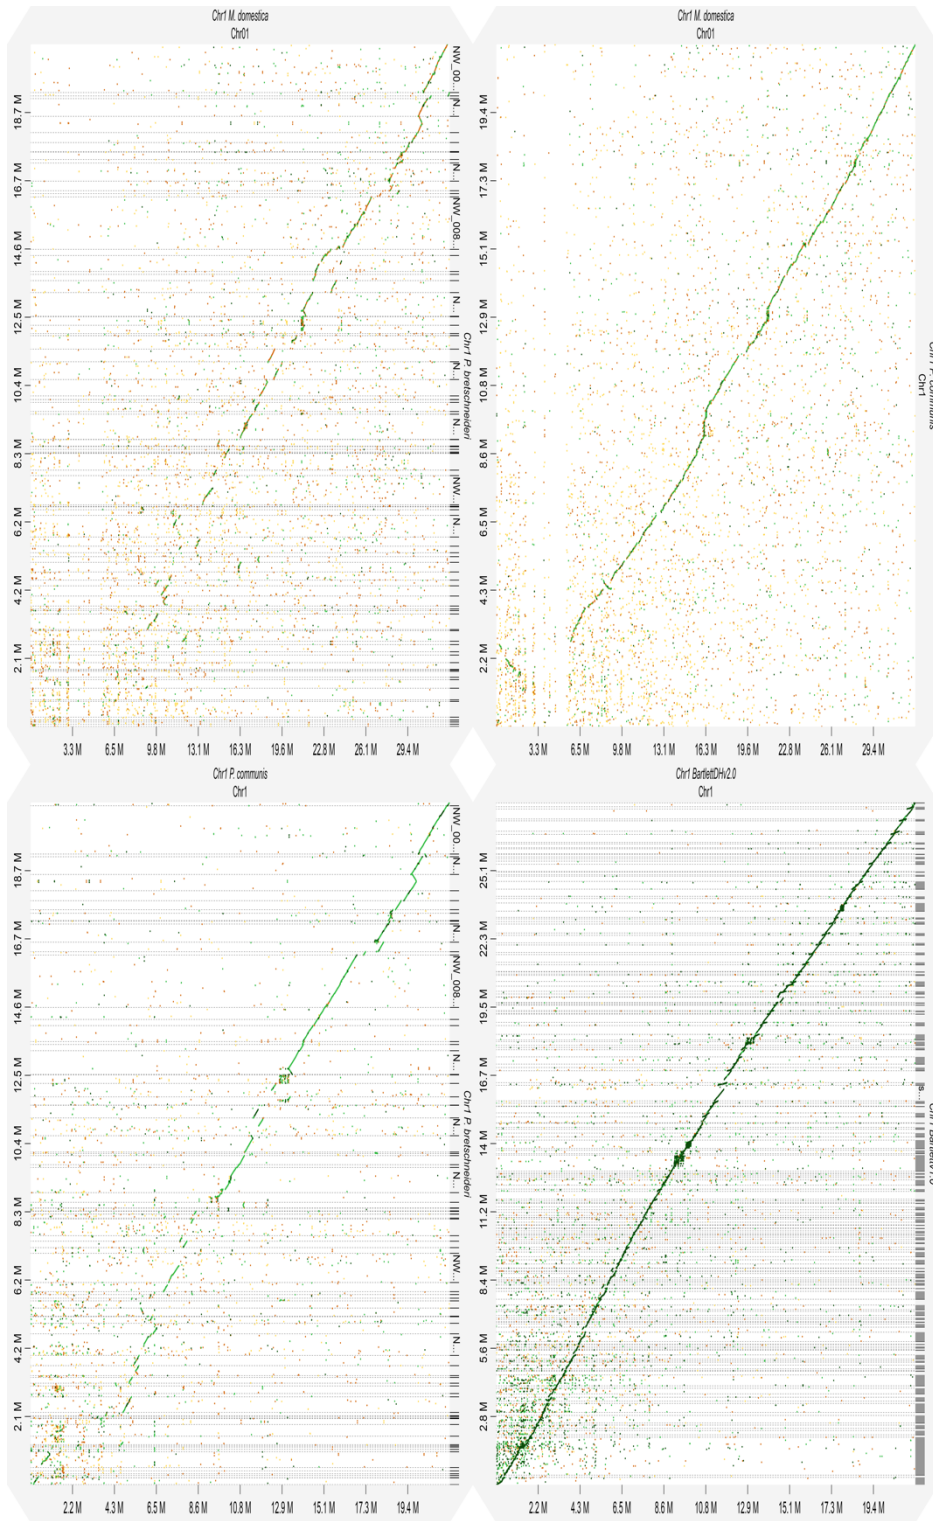

**Figure S18. Chromosome 1 alignments**

(Fig S18a) Alignment of Chromosome 1 *P. breitschneideri* to *P. communis* (top left)

(Fig S18b) Alignment of Chromosome 1 *P. communis* to *M. domestica* (top right)

(Fig S18c) Alignment of Chromosome 1 *P. breitschneideri* to *M. domestica* (bottom left)

(Fig S18d) Alignment of Chromosome 1 *P. communis* BartlettV1.0 to BartlettDHv2.0

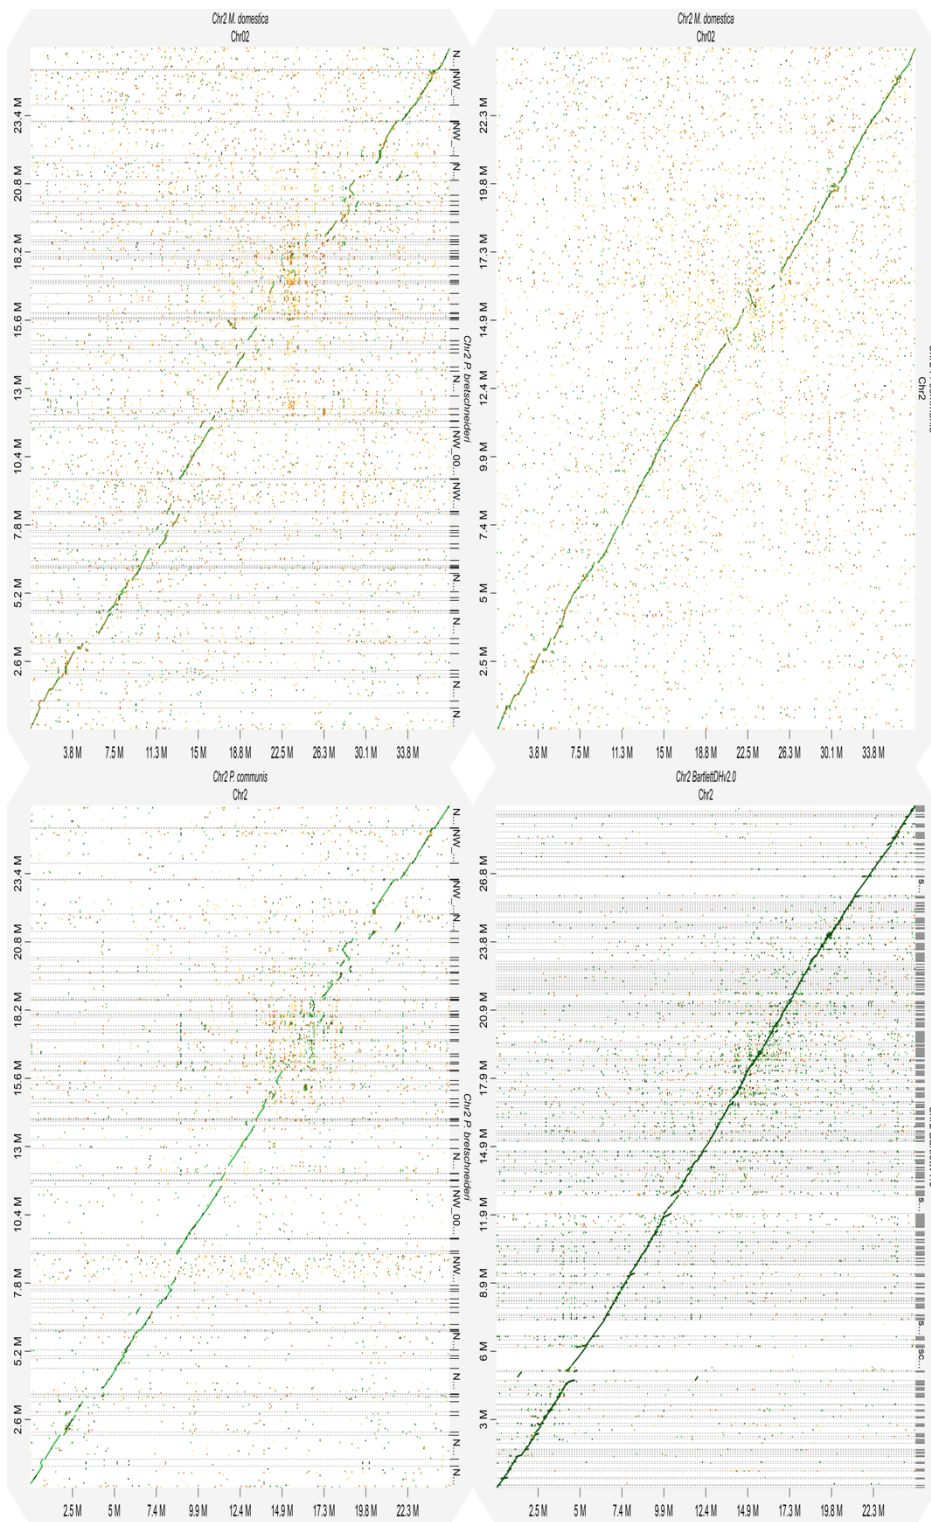

**Figure S19. Chromosome 2 alignments**

(Fig S19a) Alignment of Chromosome 2 *P. bretschneideri* to *P. communis* (top left)

(Fig S19b) Alignment of Chromosome 2 *P. communis* to *M. domestica* (top right)

(Fig S19c) Alignment of Chromosome 2 *P. bretschneideri* to *M. domestica* (bottom left)

(Fig S19d) Alignment of Chromosome 2 *P. communis* BartlettV1.0 to BartlettDHv2.0



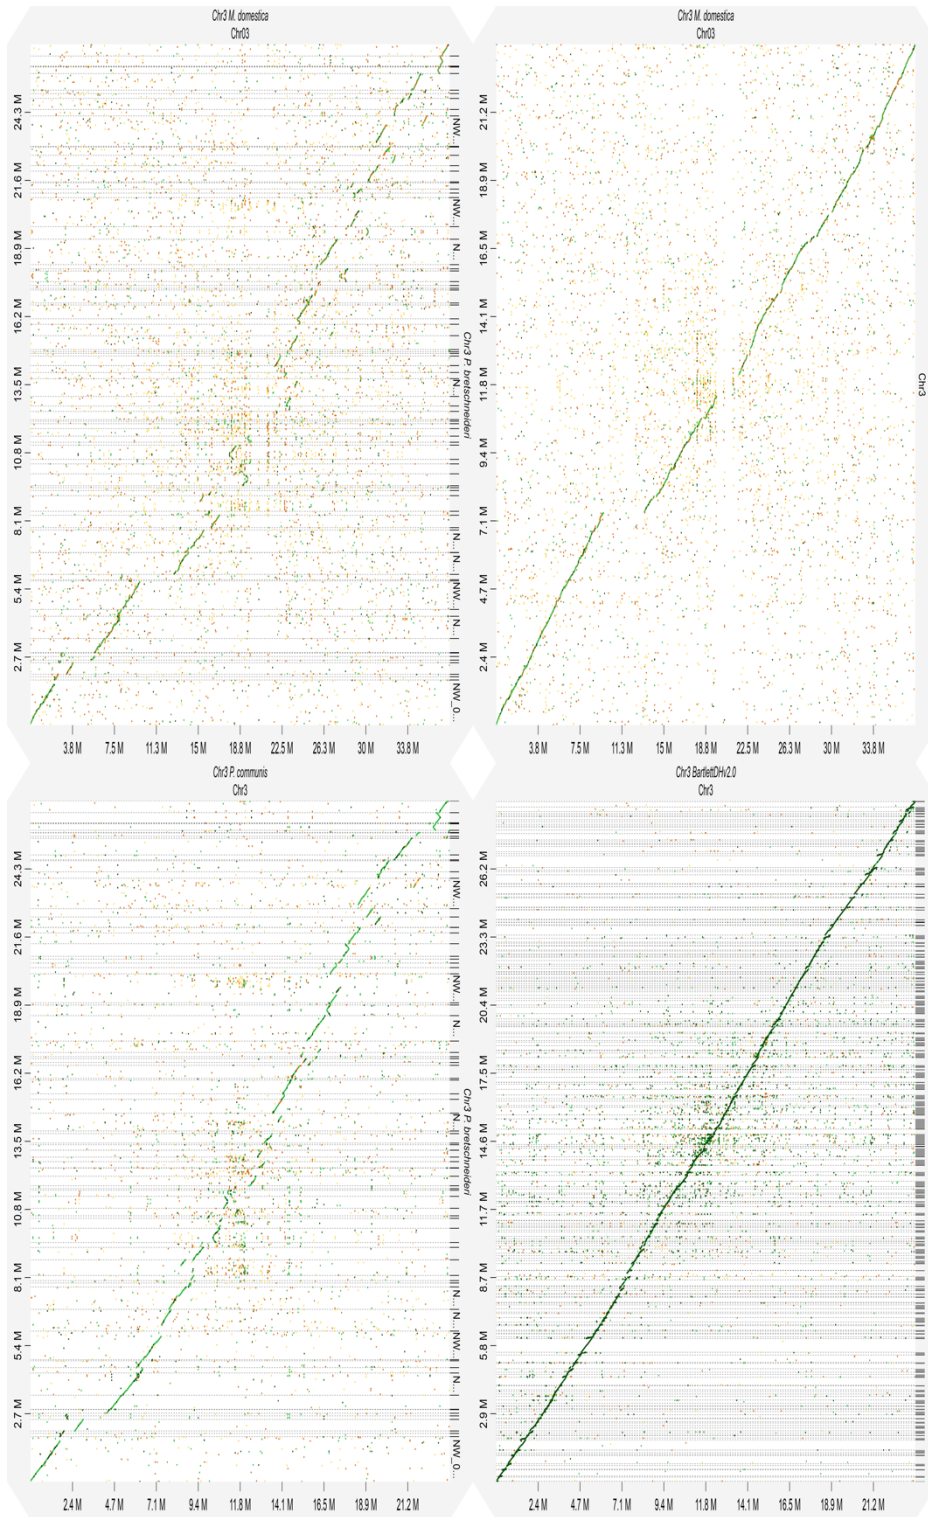

**Figure S20. Chromosome 3 alignments**

(Fig S20a) Alignment of Chromosome 3 *P. bretschneideri* to *P. communis* (top left)

(Fig S20b) Alignment of Chromosome 3 *P. communis* to *M. domestica* (top right)

(Fig S20c) Alignment of Chromosome 3 *P. bretschneideri* to *M. domestica* (bottom left)

(Fig S20d) Alignment of Chromosome 3 *P. communis* BartlettV1.0 to BartlettDHv2.0



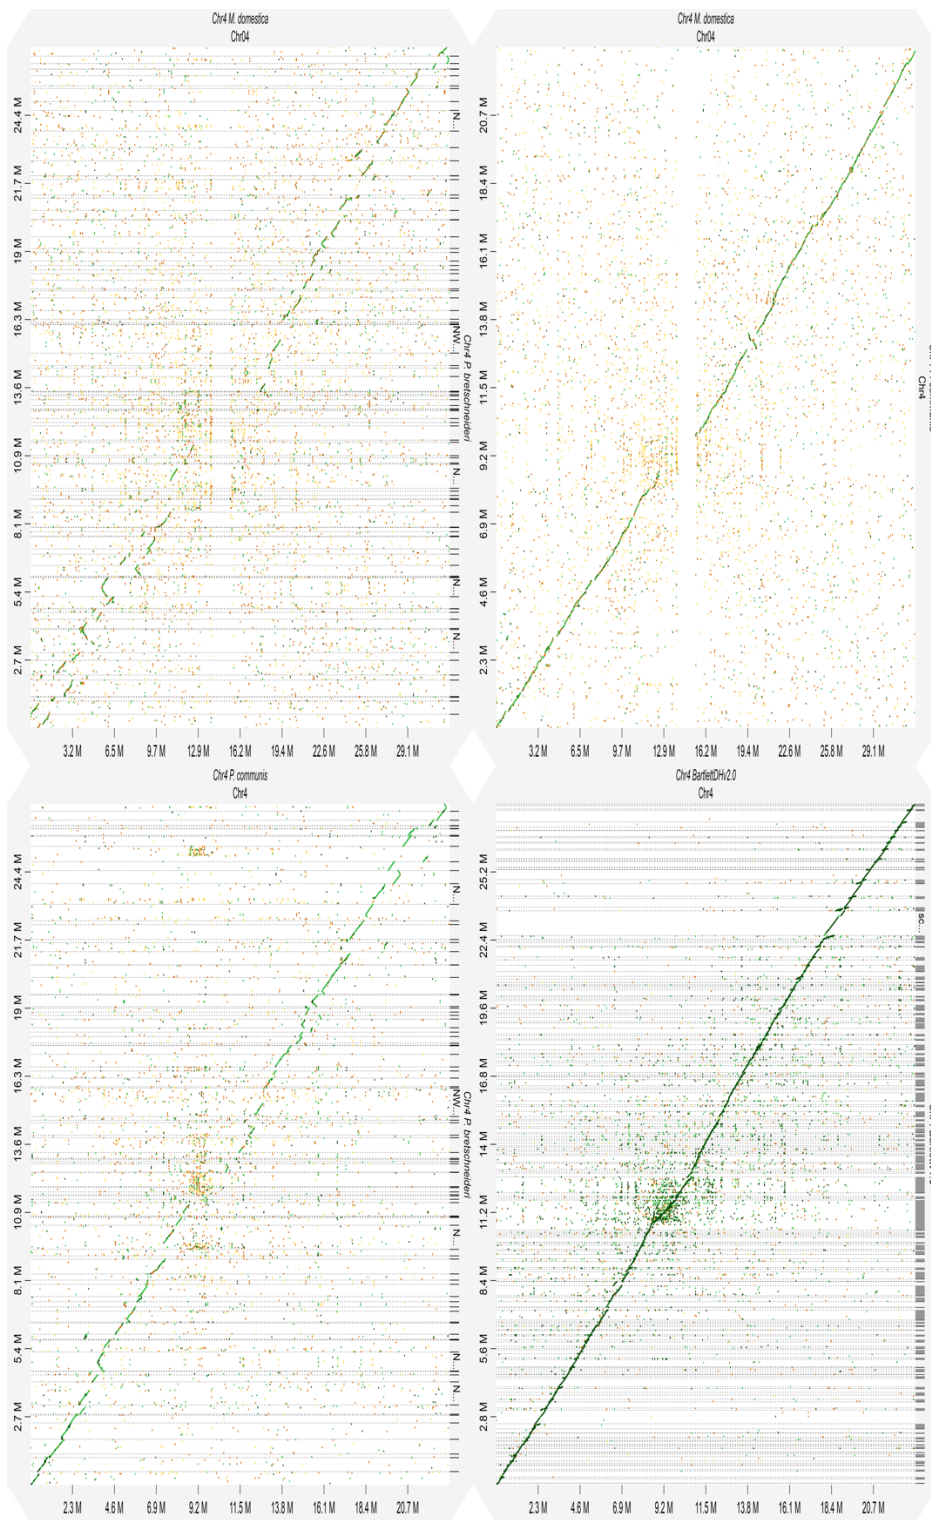

**Figure S21. Chromosome 4 alignments**

(Fig S21a) Alignment of Chromosome 4 *P. bretschneideri* to *P. communis* (top left)

(Fig S21b) Alignment of Chromosome 4 *P. communis* to *M. domestica* (top right)

(Fig S21c) Alignment of Chromosome 4 *P. bretschneideri* to *M. domestica* (bottom left)

(Fig S21d) Alignment of Chromosome 4 *P. communis* BartlettV1.0 to BartlettDHv2.0

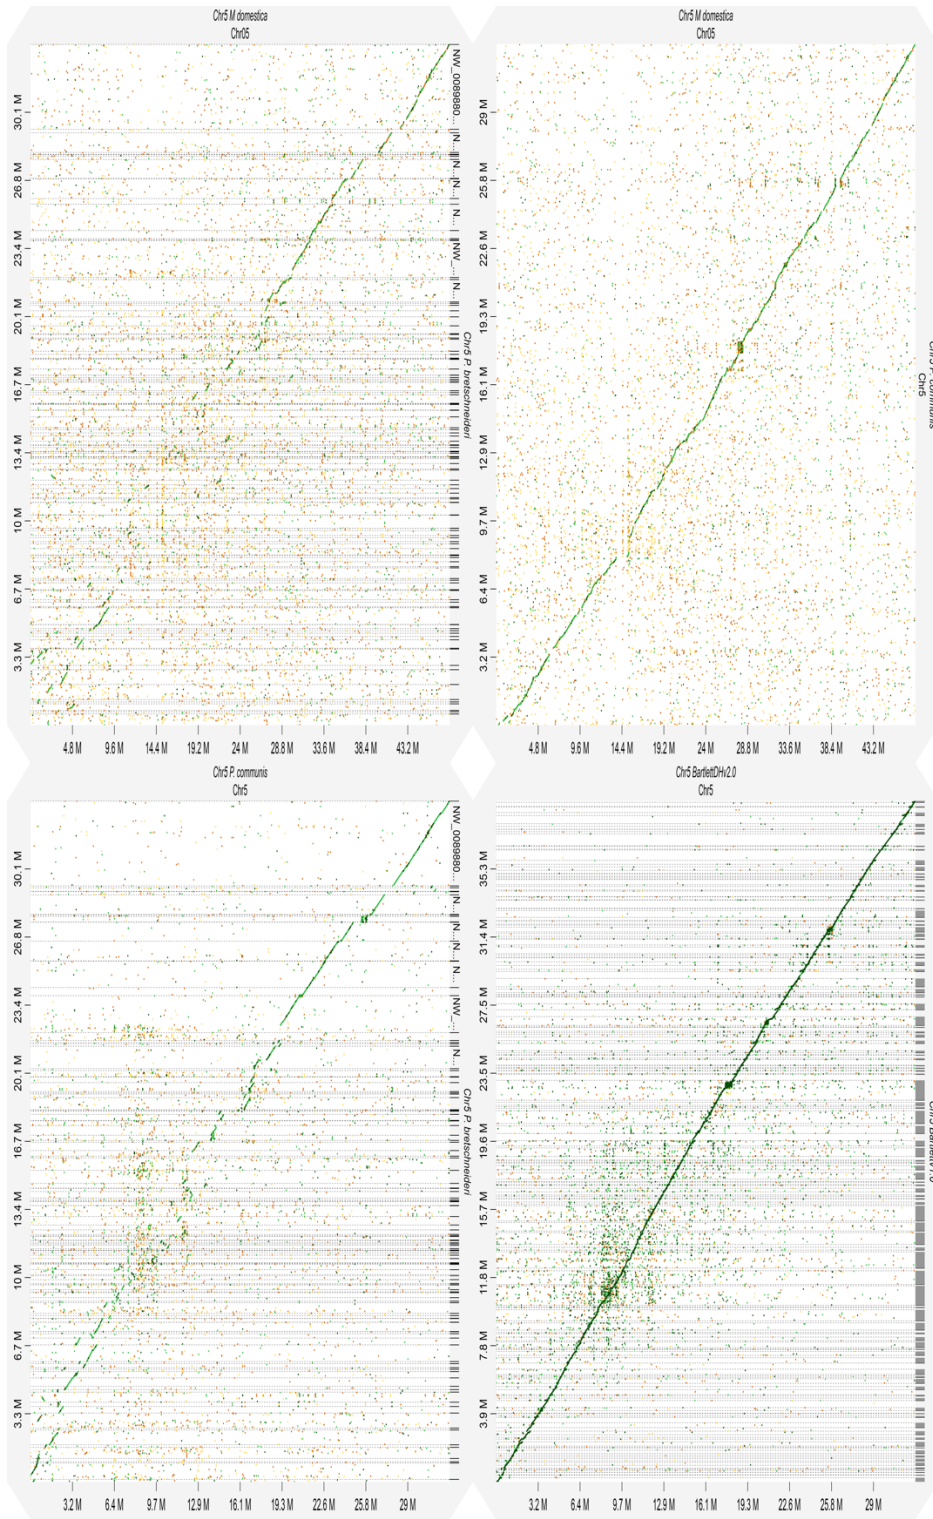

**Figure S22. Chromosome 5 alignments**

(Fig S22a) Alignment of Chromosome 5 *P. bretschneideri* to *P. communis* (top left)

(Fig S22b) Alignment of Chromosome 5 *P. communis* to *M. domestica* (top right)

(Fig S22c) Alignment of Chromosome 5 *P. bretschneideri* to *M. domestica* (bottom left)

(Fig S22d) Alignment of Chromosome 5 *P. communis* BartlettV1.0 to BartlettDHv2.0



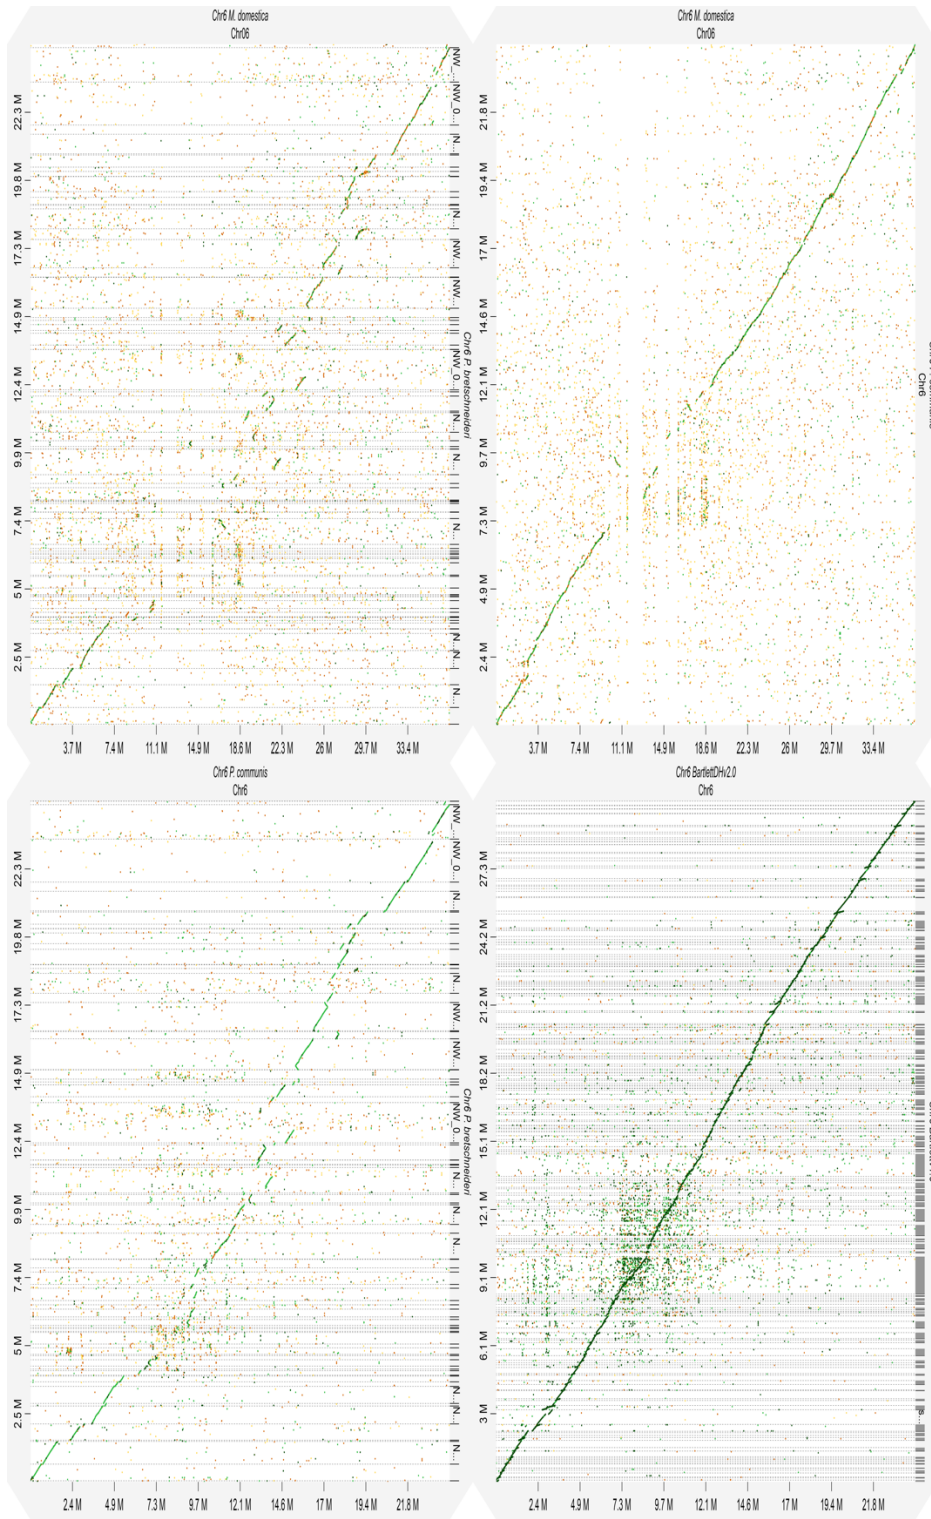

**Figure S23. Chromosome 6 alignments**

(Fig S23a) Alignment of Chromosome 6 *P. bretschneideri* to *P. communis* (top left)

(Fig S23b) Alignment of Chromosome 6 *P. communis* to *M. domestica* (top right)

(Fig S23c) Alignment of Chromosome 6 *P. bretschneideri* to *M. domestica* (bottom left)

(Fig S23d) Alignment of Chromosome 6 *P. communis* BartlettV1.0 to BartlettDHv2.0

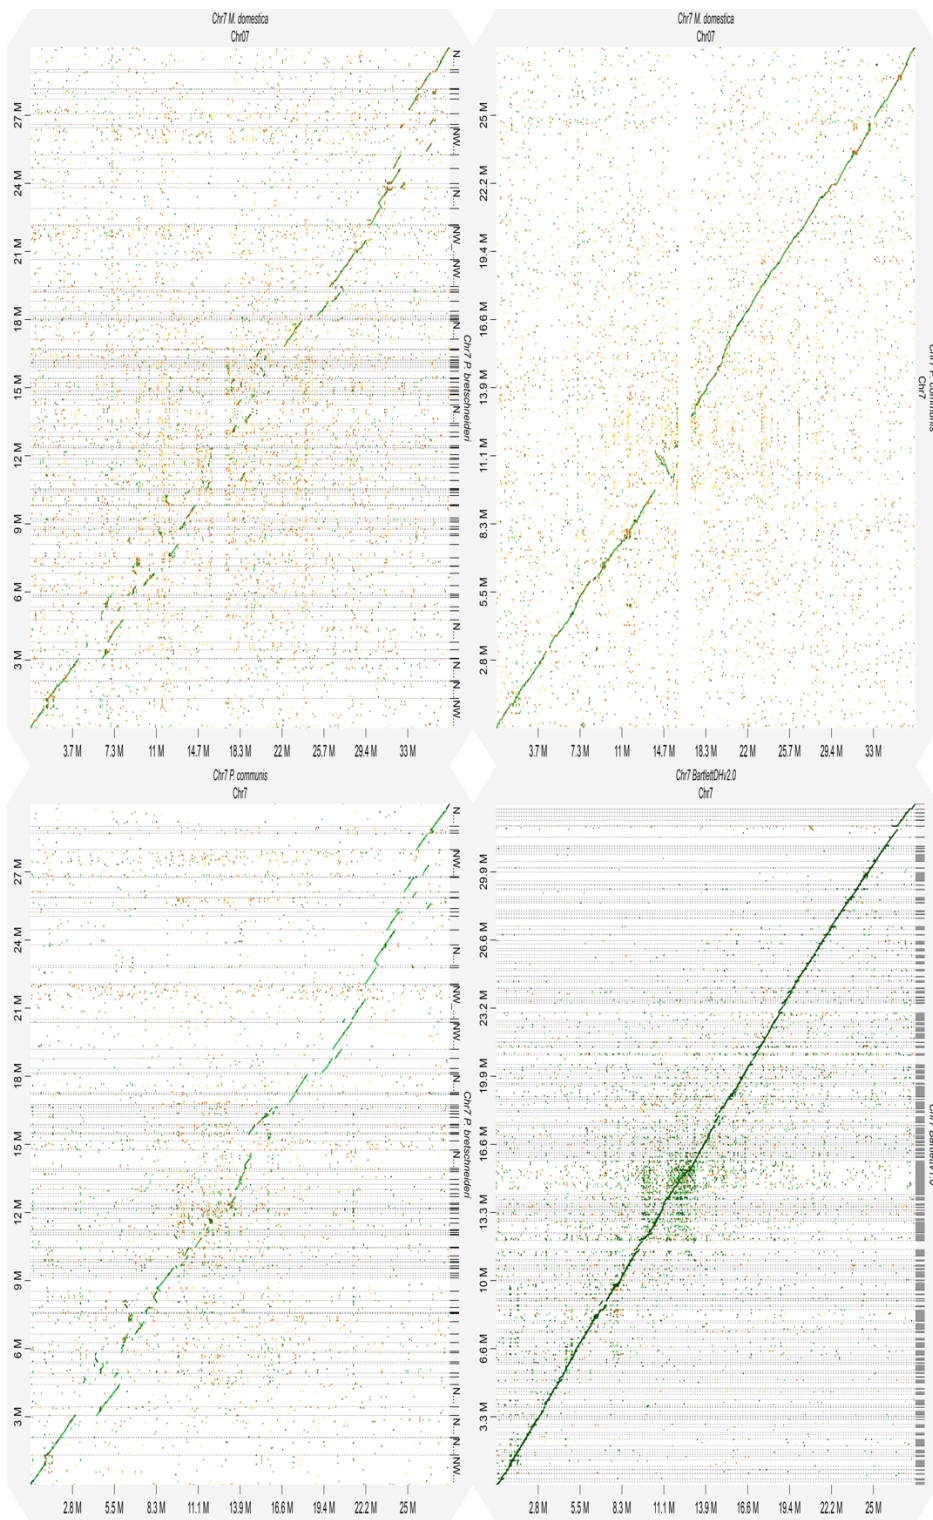

**Figure S24. Chromosome 7 alignments**

(Fig S24a) Alignment of Chromosome 7 *P. breitschneideri* to *P. communis* (top left)

(Fig S24b) Alignment of Chromosome 7 *P. communis* to *M. domestica* (top right)

(Fig S24c) Alignment of Chromosome 7 *P. breitschneideri* to *M. domestica* (bottom left)

(Fig S24d) Alignment of Chromosome 7 *P. communis* BartlettV1.0 to BartlettDHv2.0

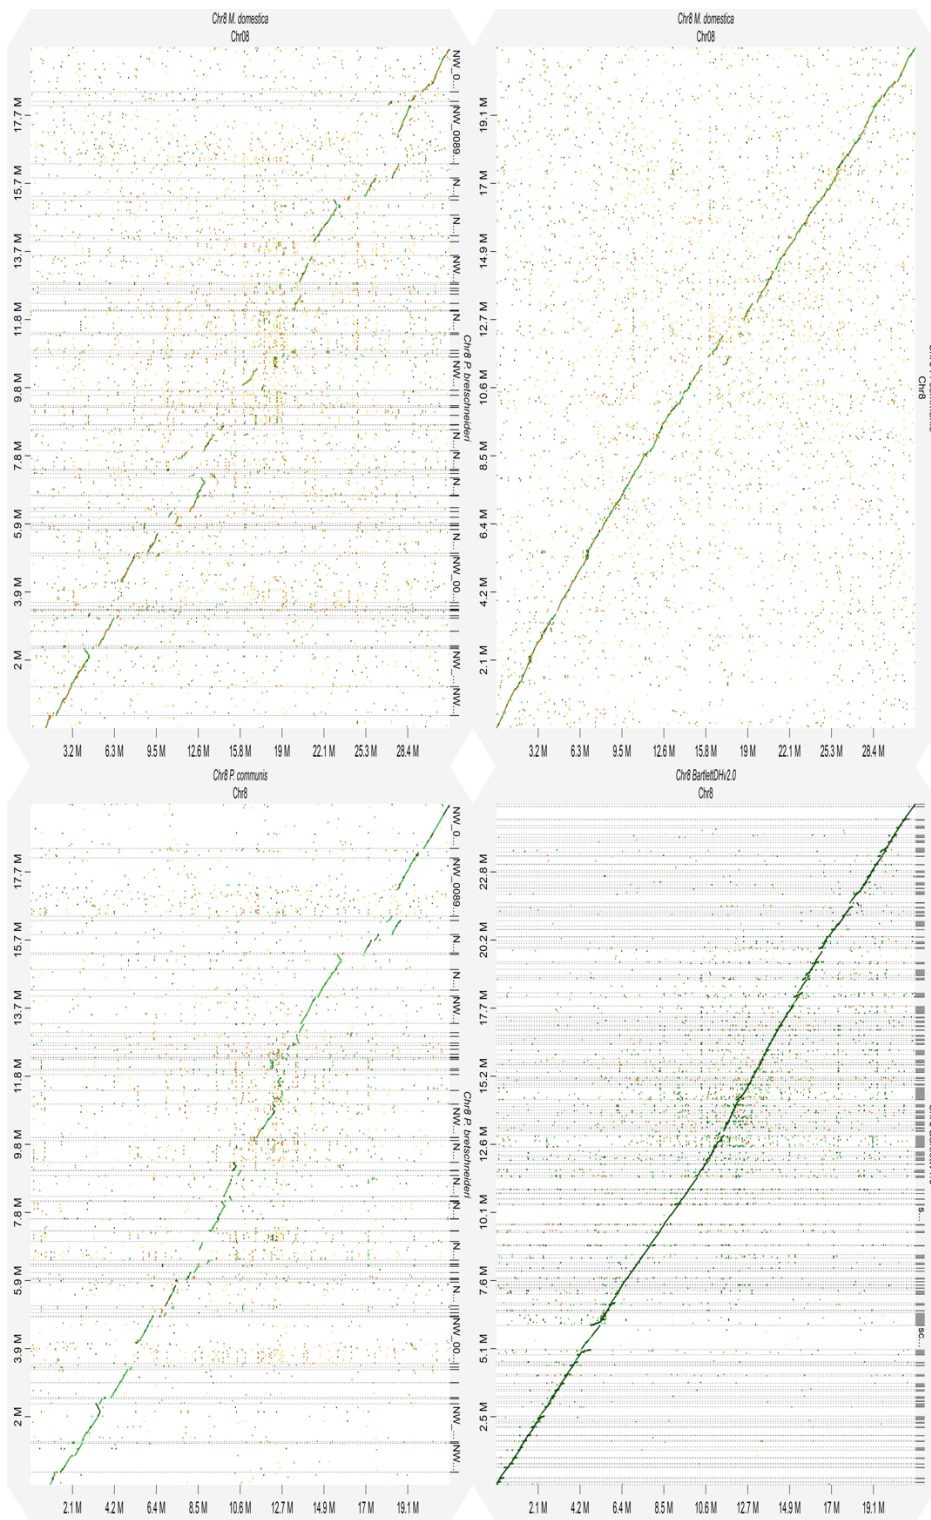

**Figure S25. Chromosome 8 alignments**

(Fig S25a) Alignment of Chromosome 8 *P. breitschneideri* to *P. communis* (top left)

(Fig S25b) Alignment of Chromosome 8 *P. communis* to *M. domestica* (top right)

(Fig S25c) Alignment of Chromosome 8 *P. breitschneideri* to *M. domestica* (bottom left)

(Fig S25d) Alignment of Chromosome 8 *P. communis* BartlettV1.0 to BartlettDHv2.0



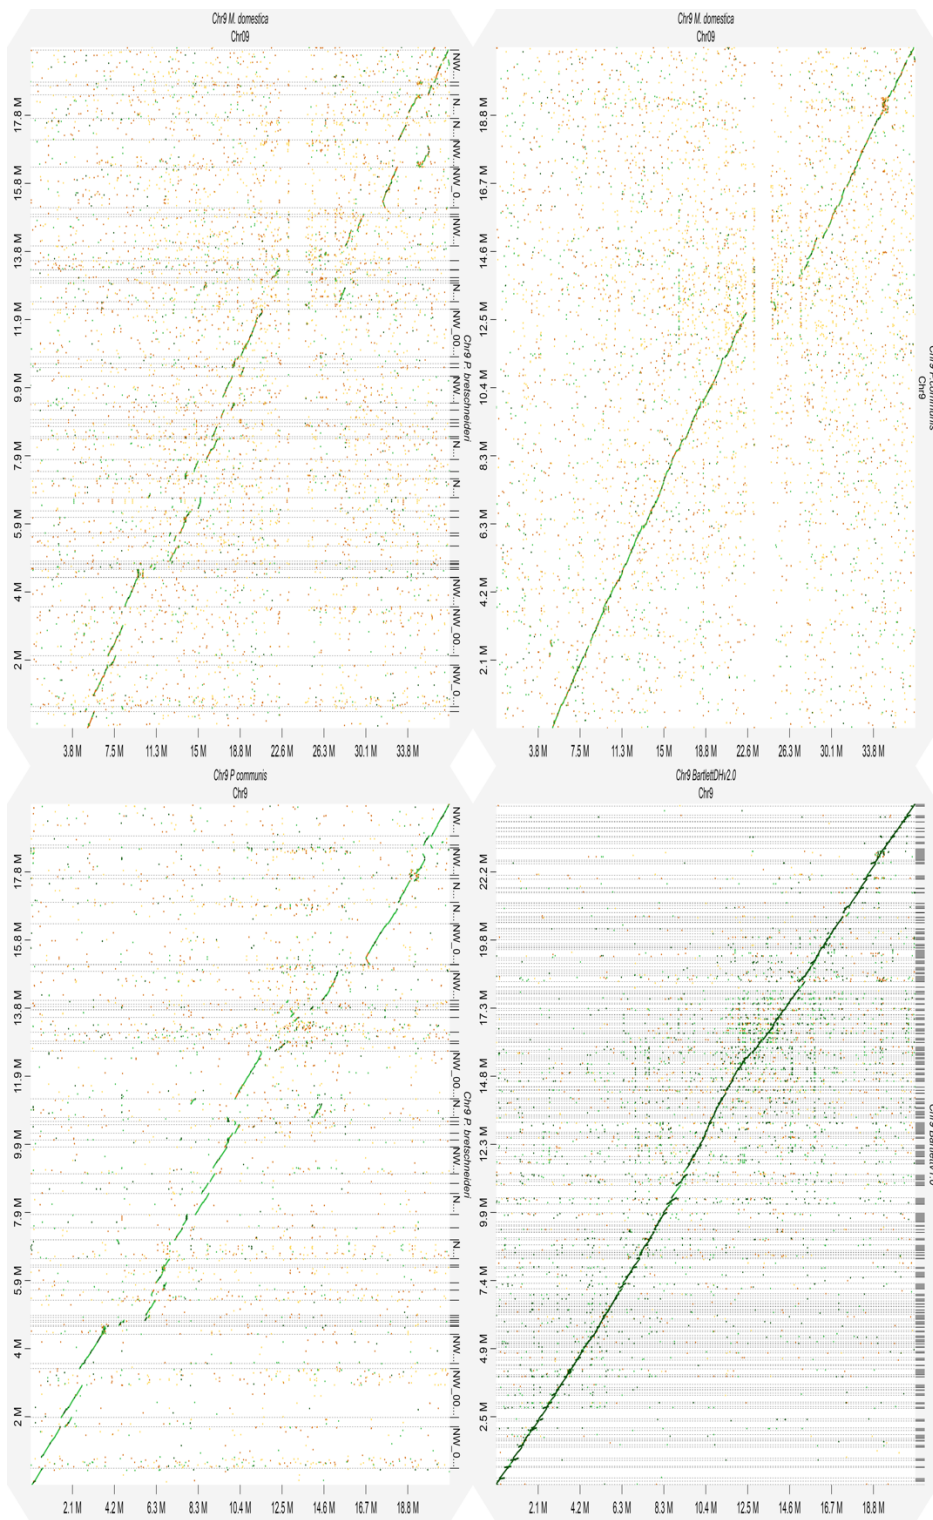

**Figure S26. Chromosome 9 alignments**

(Fig S26a) Alignment of Chromosome 9 *P. breitschneideri* to *P. communis* (top left)

(Fig S26b) Alignment of Chromosome 9 *P. communis* to *M. domestica* (top right)

(Fig S26c) Alignment of Chromosome 9 *P. breitschneideri* to *M. domestica* (bottom left)

(Fig S26d) Alignment of Chromosome 9 *P. communis* BartlettV1.0 to BartlettDHv2.0

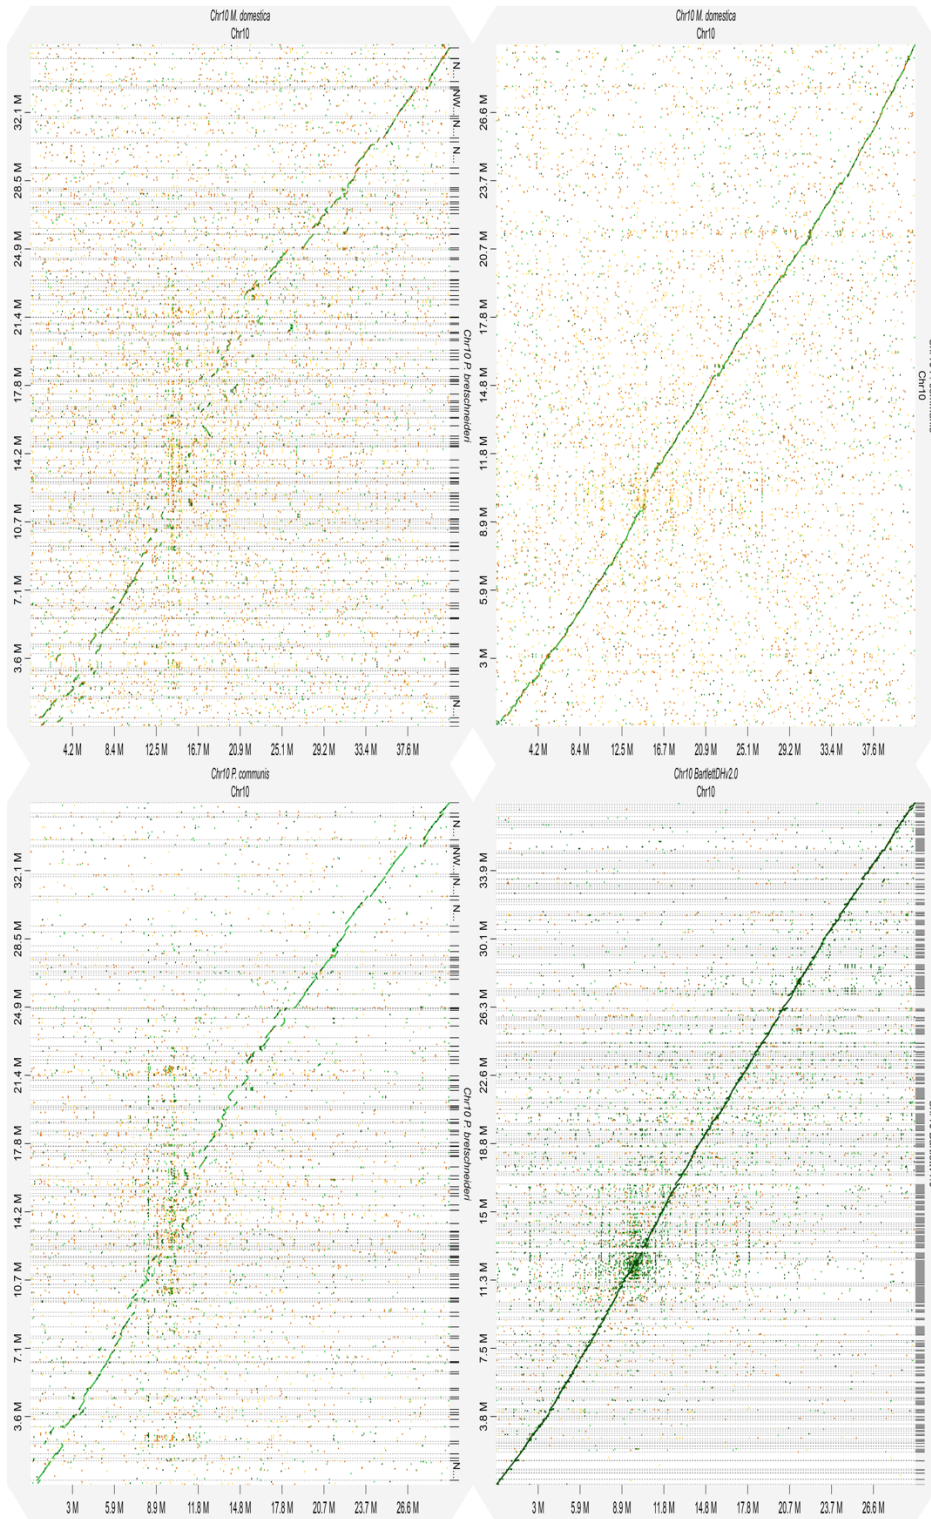

**Figure S27. Chromosome 10 alignments**

(Fig S27a) Alignment of Chromosome 10 *P. bretschnideri* to *P. communis* (top left)

(Fig S27b) Alignment of Chromosome 10 *P. communis* to *M. domestica* (top right)

(Fig S27c) Alignment of Chromosome 10 *P. bretschnideri* to *M. domestica* (bottom left)

(Fig S27d) Alignment of Chromosome 10 *P. communis* BartlettV1.0 to BartlettDHv2.0



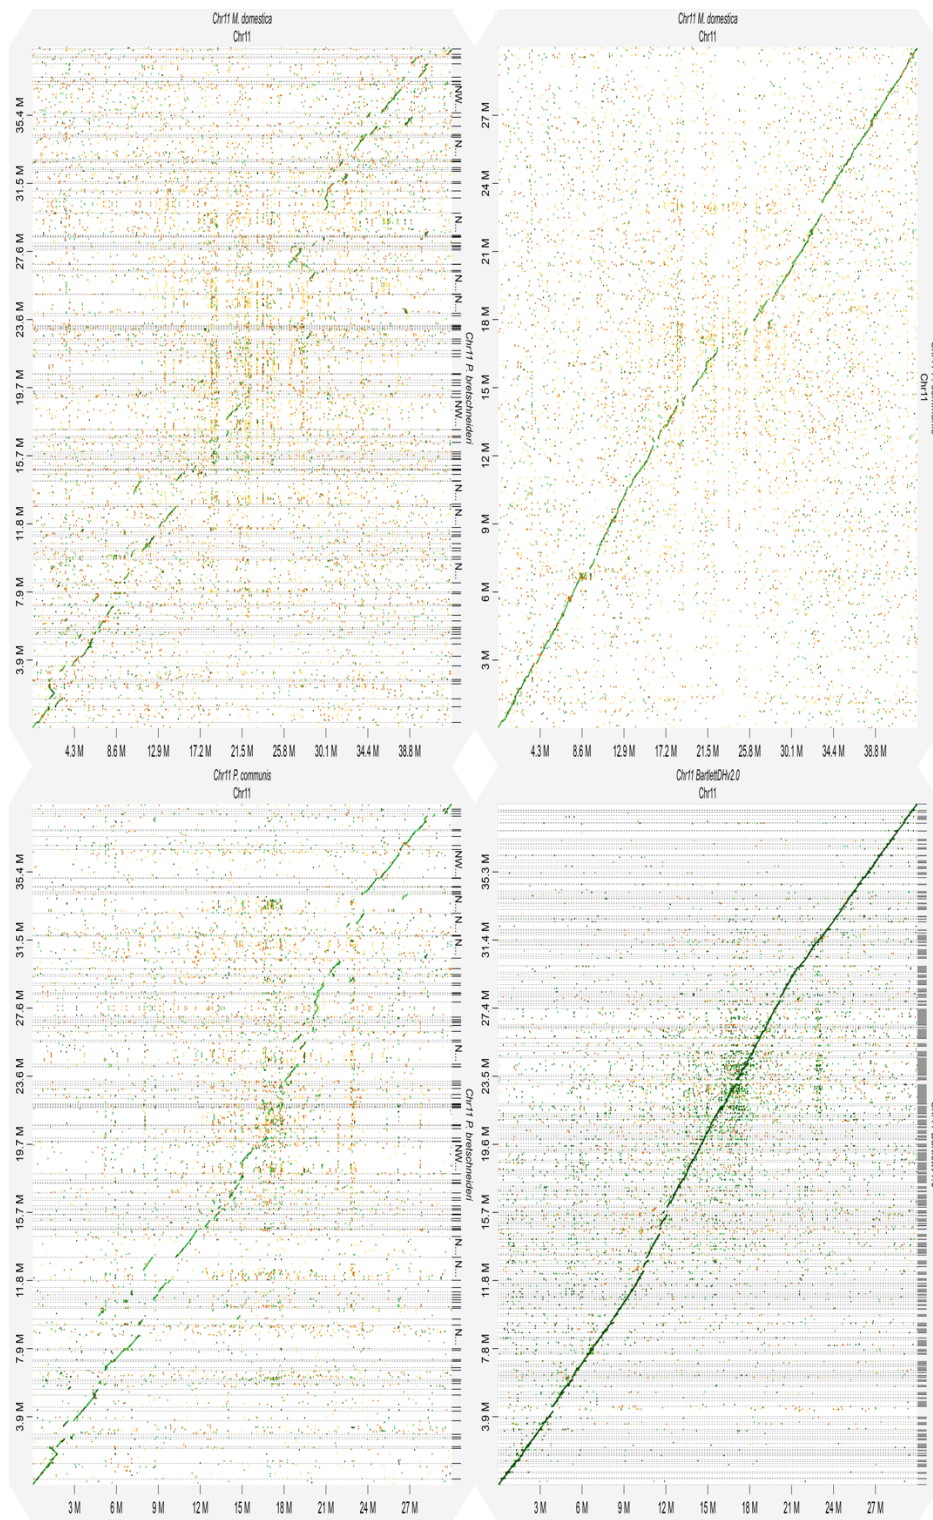

**Figure S28. Chromosome 11 alignments**

(Fig S28a) Alignment of Chromosome 11 *P. breitschneideri* to *P. communis* (top left)

(Fig S28b) Alignment of Chromosome 11 *P. communis* to *M. domestica* (top right)

(Fig S28c) Alignment of Chromosome 11 *P. breitschneideri* to *M. domestica* (bottom left)

(Fig S28d) Alignment of Chromosome 11 *P. communis* BartlettV1.0 to BartlettDHv2.0



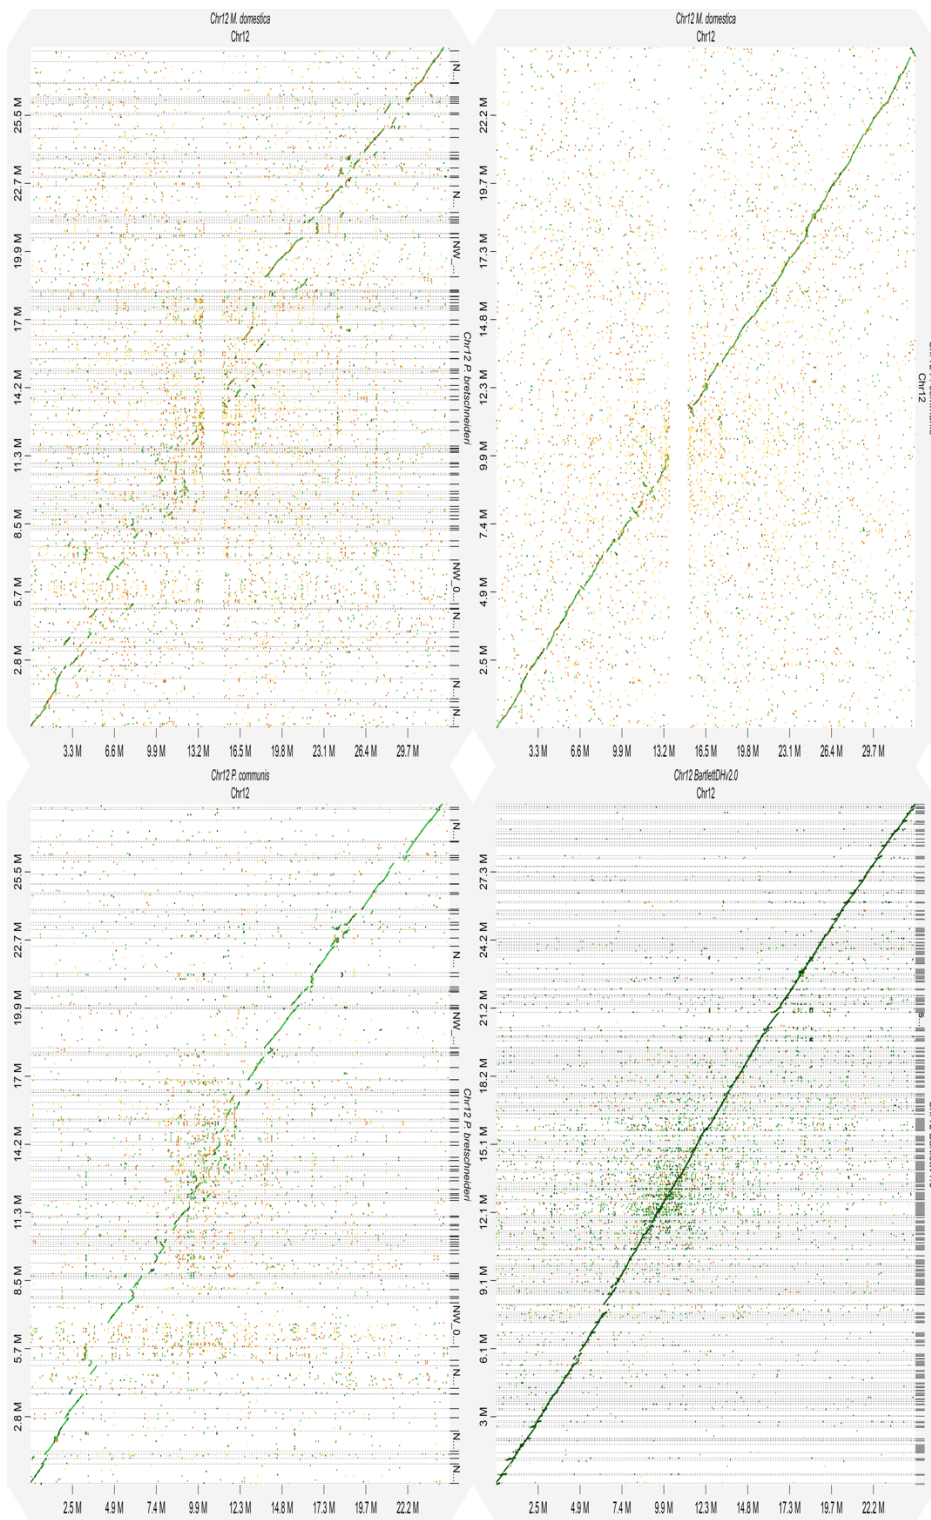

**Figure S29. Chromosome 12 alignments**

(Fig S29a) Alignment of Chromosome 12 *P. bretschnideri* to *P. communis* (top left)

(Fig S29b) Alignment of Chromosome 12 *P. communis* to *M. domestica* (top right)

(Fig S29c) Alignment of Chromosome 12 *P. bretschnideri* to *M. domestica* (bottom left)

(Fig S29d) Alignment of Chromosome 12 *P. communis* BartlettV1.0 to BartlettDHv2.0

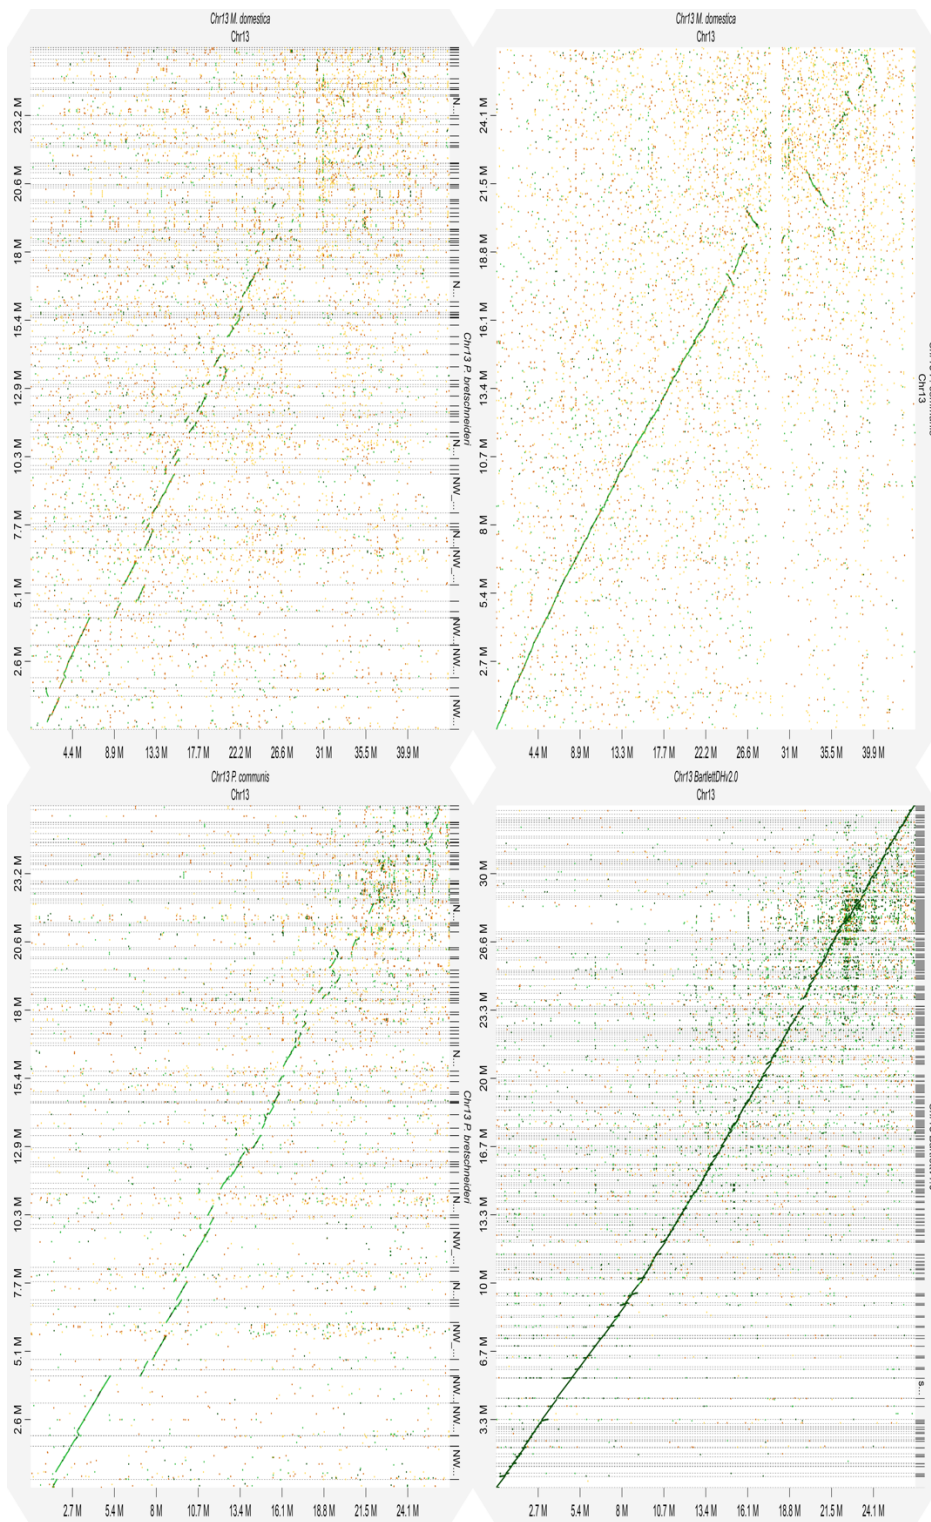

**Figure S30. Chromosome 13 alignments**

(Fig S30a) Alignment of Chromosome 13 *P. bretschnideri* to *P. communis* (top left)

(Fig S30b) Alignment of Chromosome 13 *P. communis* to *M. domestica* (top right)

(Fig S30c) Alignment of Chromosome 13 *P. bretschnideri* to *M. domestica* (bottom left)

(Fig S30d) Alignment of Chromosome 13 *P. communis* BartlettV1.0 to BartlettDHv2.0

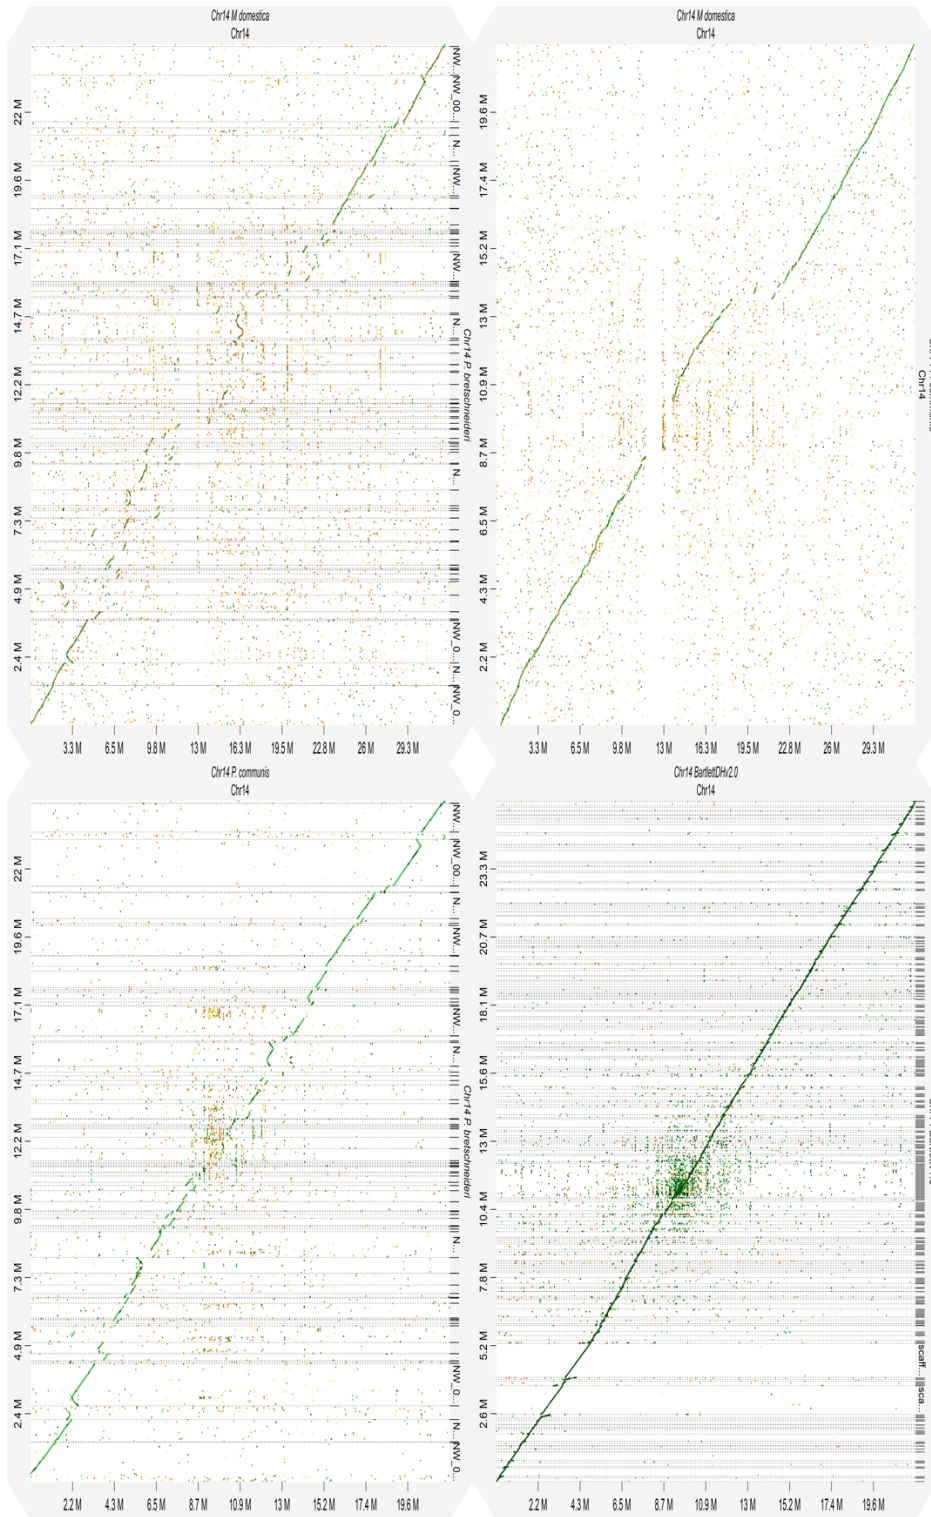

**Figure S31. Chromosome 14 alignments**

(Fig S31a) Alignment of Chromosome 14 *P. breitschneideri* to *P. communis* (top left)

(Fig S31b) Alignment of Chromosome 14 *P. communis* to *M. domestica* (top right)

(Fig S31c) Alignment of Chromosome 14 *P. breitschneideri* to *M. domestica* (bottom left)

(Fig S31d) Alignment of Chromosome 14 *P. communis* BartlettV1.0 to BartlettDHv2.0



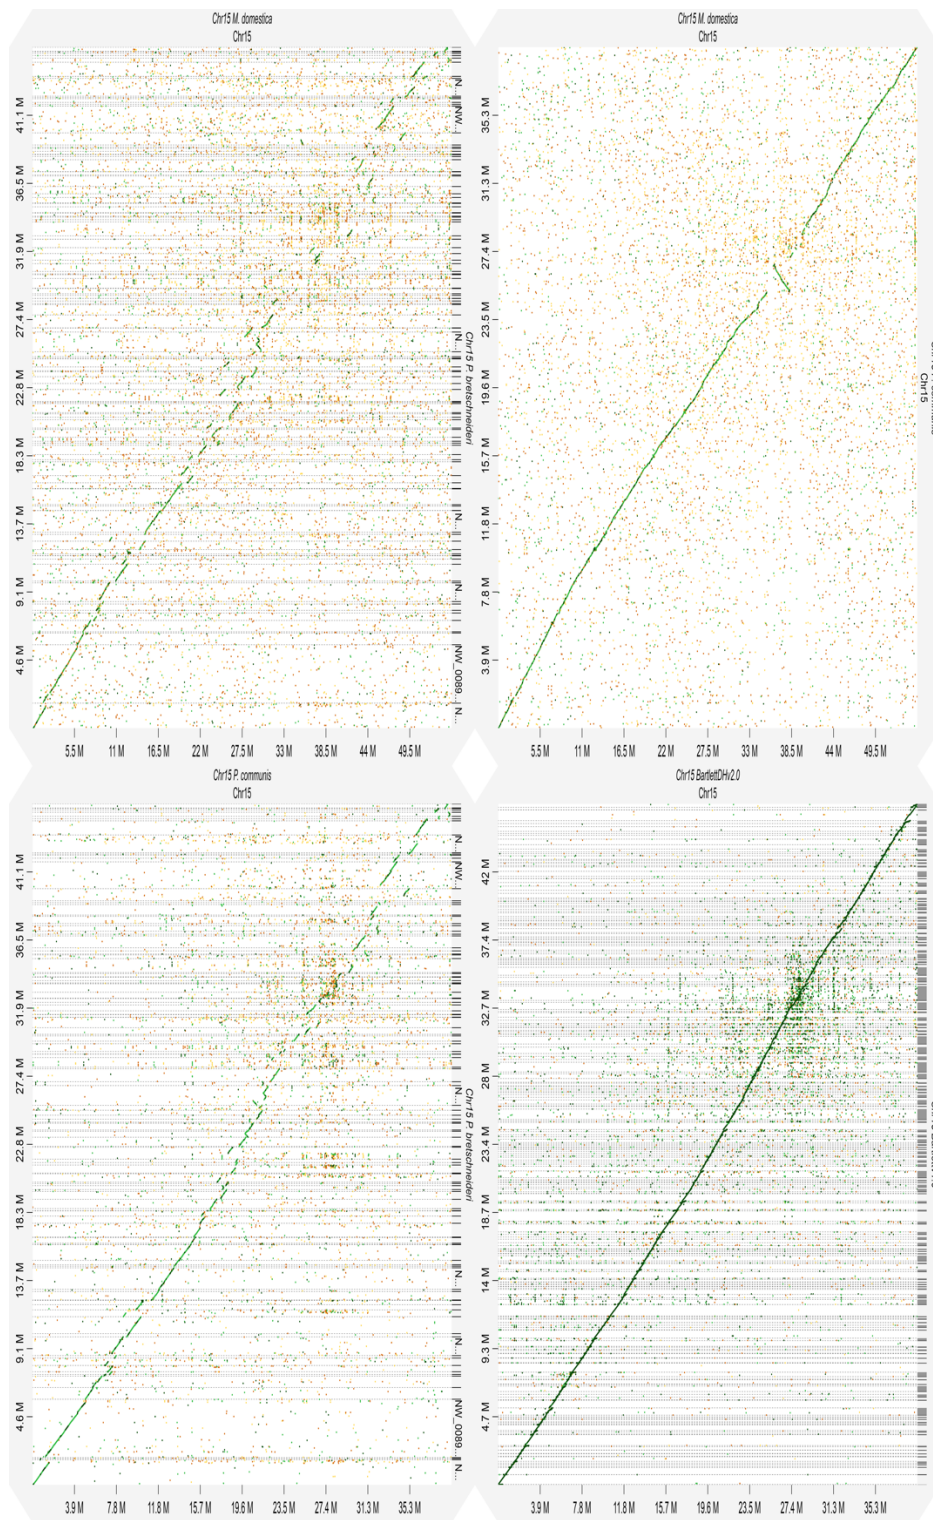

**Figure S32. Chromosome 15 alignments**

(Fig S32a) Alignment of Chromosome 15 *P. breitschneideri* to *P. communis* (top left)

(Fig S32b) Alignment of Chromosome 15 *P. communis* to *M. domestica* (top right)

(Fig S32c) Alignment of Chromosome 15 *P. breitschneideri* to *M. domestica* (bottom left)

(Fig S32d) Alignment of Chromosome 15 *P. communis* BartlettV1.0 to BartlettDHv2.0

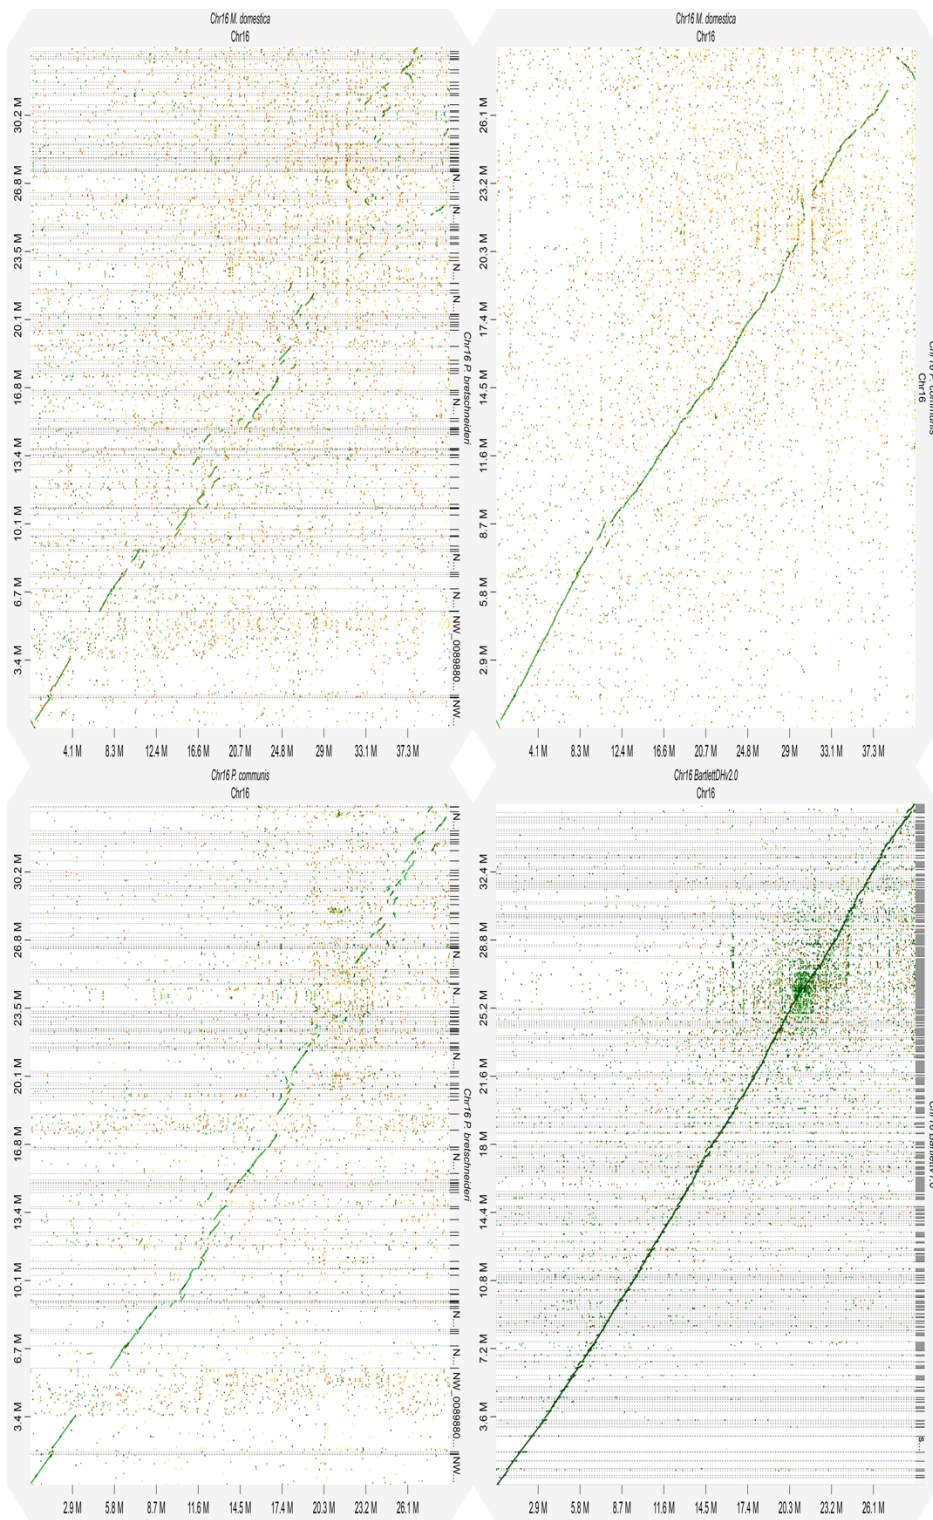

**Figure S33. Chromosome 16 alignments**

(Fig S33a) Alignment of Chromosome 16 *P. breitschneideri* to *P. communis* (top left)

(Fig S33b) Alignment of Chromosome 16 *P. communis* to *M. domestica* (top right)

(Fig S33c) Alignment of Chromosome 16 *P. breitschneideri* to *M. domestica* (bottom left)

(Fig S33d) Alignment of Chromosome 16 *P. communis* Bartlett1.0 to BartlettDHv2.0



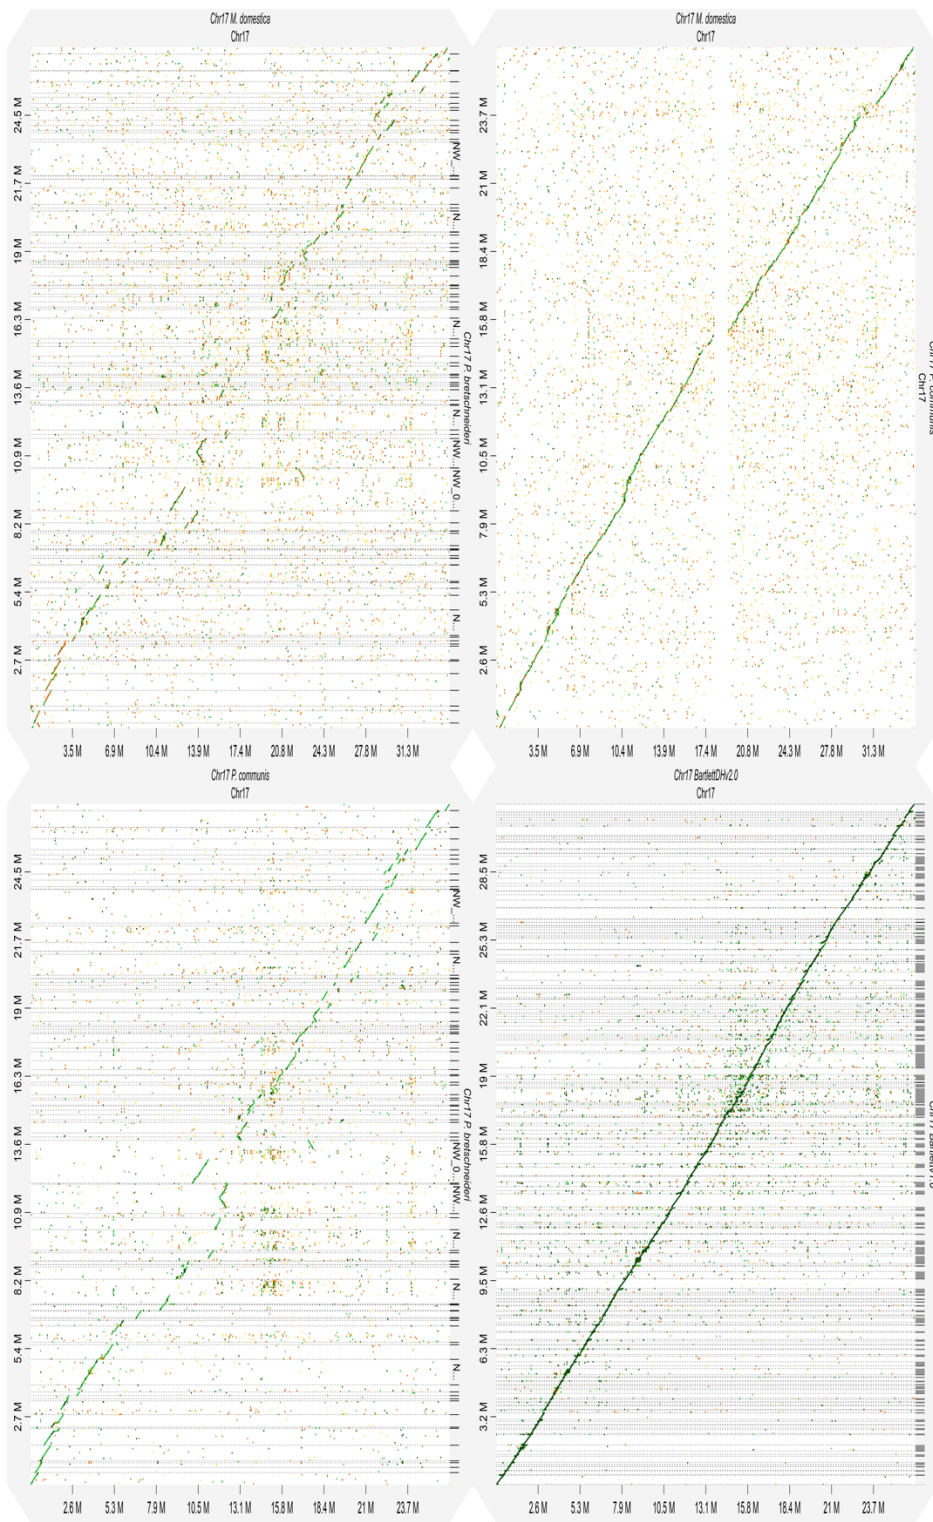

**Figure S34. Chromosome 17 alignments**

(Fig S34a) Alignment of Chromosome 17 *P. breitschneideri* to *P. communis* (top left)

(Fig S34b) Alignment of Chromosome 17 *P. communis* to *M. domestica* (top right)

(Fig S34c) Alignment of Chromosome 17 *P. breitschneideri* to *M. domestica* (bottom left)

(Fig S34d) Alignment of Chromosome 17 *P. communis* BartlettV1.0 to BartlettDHv2.0

Enriched GO terms

Table S1 GO terms enriched in *P. communis* genes determined to be pomme specific

| #Type | GO-id      | Enrichment  | p-value     | subset-ratio | description                                                         |
|-------|------------|-------------|-------------|--------------|---------------------------------------------------------------------|
| MF    | GO:0001882 | 0.411353449 | 6.16E-04    | 25.03037667  | nucleoside binding                                                  |
| MF    | GO:0001883 | 0.409747787 | 7.06E-04    | 24.90886999  | purine nucleoside binding                                           |
| MF    | GO:0003824 | 0.259594027 | 9.57E-07    | 59.29526124  | catalytic activity                                                  |
| MF    | GO:0004872 | 0.98725488  | 0.038161026 | 4.009720535  | receptor activity                                                   |
| MF    | GO:0004888 | 0.98725488  | 0.038161026 | 4.009720535  | transmembrane receptor activity                                     |
| MF    | GO:0005215 | 0.595920778 | 0.043424568 | 8.991494532  | transporter activity                                                |
| MF    | GO:0005216 | 1.580096674 | 0.010753402 | 2.187120292  | ion channel activity                                                |
| MF    | GO:0005524 | 0.462925951 | 7.16E-05    | 24.54434994  | ATP binding                                                         |
| MF    | GO:0015075 | 1.066765598 | 2.41E-04    | 5.953827461  | ion transmembrane transporter activity                              |
| MF    | GO:0015082 | 1.81322548  | 0.026644798 | 1.579586877  | di-, tri-valent inorganic cation transmembrane transporter activity |
| MF    | GO:0015267 | 1.562818683 | 0.012551231 | 2.187120292  | channel activity                                                    |

|    |            |             |             |             |                                                                                       |
|----|------------|-------------|-------------|-------------|---------------------------------------------------------------------------------------|
| MF | GO:0015662 | 2.039783931 | 2.60E-04    | 2.065613609 | ATPase activity, coupled to transmembrane movement of ions, phosphorylative mechanism |
| MF | GO:0017076 | 0.362399652 | 0.003413612 | 26.00243013 | purine nucleotide binding                                                             |
| MF | GO:0022803 | 1.562818683 | 0.012551231 | 2.187120292 | passive transmembrane transporter activity                                            |
| MF | GO:0022804 | 0.929996543 | 0.041293348 | 4.374240583 | active transmembrane transporter activity                                             |
| MF | GO:0022838 | 1.580096674 | 0.010753402 | 2.187120292 | substrate-specific channel activity                                                   |
| MF | GO:0022857 | 0.79510714  | 0.002745981 | 7.776427704 | transmembrane transporter activity                                                    |
| MF | GO:0022891 | 0.958105226 | 3.31E-04    | 6.925880923 | substrate-specific transmembrane transporter activity                                 |
| MF | GO:0022892 | 0.883137525 | 8.73E-04    | 7.290400972 | substrate-specific transporter activity                                               |
| MF | GO:0030554 | 0.409747787 | 7.06E-04    | 24.90886999 | adenyl nucleotide binding                                                             |



|    |            |             |             |             |                                                            |
|----|------------|-------------|-------------|-------------|------------------------------------------------------------|
| MF | GO:0032553 | 0.414544354 | 3.86E-04    | 25.63791009 | ribonucleotide binding                                     |
| MF | GO:0032555 | 0.414544354 | 3.86E-04    | 25.63791009 | purine ribonucleotide binding                              |
| MF | GO:0032559 | 0.462212099 | 7.42E-05    | 24.54434994 | adenyl ribonucleotide binding                              |
| MF | GO:0042625 | 1.59654954  | 0.015306675 | 2.065613609 | ATPase activity, coupled to transmembrane movement of ions |
| MF | GO:0046873 | 1.463283009 | 0.019407649 | 2.308626974 | metal ion transmembrane transporter activity               |
| BP | GO:0006754 | 1.515121941 | 0.044409183 | 2.065613609 | ATP biosynthetic process                                   |
| BP | GO:0009141 | 1.495704487 | 0.033186541 | 2.187120292 | nucleoside triphosphate metabolic process                  |
| BP | GO:0009142 | 1.495704487 | 0.033186541 | 2.187120292 | nucleoside triphosphate biosynthetic process               |
| BP | GO:0009144 | 1.495704487 | 0.033186541 | 2.187120292 | purine nucleoside triphosphate metabolic process           |

|    |            |             |             |             |                                                         |
|----|------------|-------------|-------------|-------------|---------------------------------------------------------|
| BP | GO:0009145 | 1.495704487 | 0.033186541 | 2.187120292 | purine nucleoside triphosphate biosynthetic process     |
| BP | GO:0009199 | 1.495704487 | 0.033186541 | 2.187120292 | ribonucleoside triphosphate metabolic process           |
| BP | GO:0009201 | 1.495704487 | 0.033186541 | 2.187120292 | ribonucleoside triphosphate biosynthetic process        |
| BP | GO:0009205 | 1.495704487 | 0.033186541 | 2.187120292 | purine ribonucleoside triphosphate metabolic process    |
| BP | GO:0009206 | 1.495704487 | 0.033186541 | 2.187120292 | purine ribonucleoside triphosphate biosynthetic process |
| BP | GO:0045087 | 1.037018255 | 0.038395427 | 3.888213852 | innate immune response                                  |
| BP | GO:0046034 | 1.515121941 | 0.044409183 | 2.065613609 | ATP metabolic process                                   |
| CC | GO:0005741 | 2.548171907 | 0.018169086 | 0.85054678  | mitochondrial outer membrane                            |
